# Supplementary material for: Association between the neutrophil-to-lymphocyte ratio and psoriasis: a cross-sectional study of the National Health and Nutrition Examination Survey 2011–2014
Source: PubMed Central journal article supplement — BMJ Open. 2023 Dec 7;13(12):e077596. doi: 10.1136/bmjopen-2023-077596 (PMC10711904; doi:10.1136/bmjopen-2023-077596), 2023-12-07
Supplement: bmjopen-2023-077596.draft_revisions.pdf [file bmjopen-2023-077596.draft_revisions.pdf]

# BMJ Open

BMJ Open is committed to open peer review. As part of this commitment we make the peer review history of every article we publish publicly available.

When an article is published we post the peer reviewers' comments and the authors' responses online. We also post the versions of the paper that were used during peer review. These are the versions that the peer review comments apply to.

The versions of the paper that follow are the versions that were submitted during the peer review process. They are not the versions of record or the final published versions. They should not be cited or distributed as the published version of this manuscript.

BMJ Open is an open access journal and the full, final, typeset and author-corrected version of record of the manuscript is available on our site with no access controls, subscription charges or pay-per-view fees (<http://bmjopen.bmj.com>).

If you have any questions on BMJ Open's open peer review process please email [info.bmjopen@bmj.com](mailto:info.bmjopen@bmj.com)

# BMJ Open

## Association between neutrophil to lymphocyte ratio and psoriasis: A cross-sectional study of National Health and Nutrition Examination Survey 2011–2014

|                               |                                                                                                                                                                                                                                                                                                                                                                                                                                                                                                                                                                                                               |
|-------------------------------|---------------------------------------------------------------------------------------------------------------------------------------------------------------------------------------------------------------------------------------------------------------------------------------------------------------------------------------------------------------------------------------------------------------------------------------------------------------------------------------------------------------------------------------------------------------------------------------------------------------|
| Journal:                      | <i>BMJ Open</i>                                                                                                                                                                                                                                                                                                                                                                                                                                                                                                                                                                                               |
| Manuscript ID                 | bmjopen-2023-077596                                                                                                                                                                                                                                                                                                                                                                                                                                                                                                                                                                                           |
| Article Type:                 | Original research                                                                                                                                                                                                                                                                                                                                                                                                                                                                                                                                                                                             |
| Date Submitted by the Author: | 11-Jul-2023                                                                                                                                                                                                                                                                                                                                                                                                                                                                                                                                                                                                   |
| Complete List of Authors:     | Hong, Jiaxin; School of Public Health, Nanjing Medical University, Nanjing, Jiangsu, 211166, China<br>Lian, Ni; Jiangsu Key Laboratory of Molecular Biology for Skin Diseases and STIs, Institute of Dermatology, Chinese Academy of Medical Sciences & Peking Union Medical College, Nanjing, 210042, China<br>Li, Min; School of Public Health, Nanjing Medical University, Nanjing, Jiangsu, 211166, China, ; Jiangsu Key Laboratory of Molecular Biology for Skin Diseases and STIs, Institute of Dermatology, Chinese Academy of Medical Sciences & Peking Union Medical College, Nanjing, 210042, China |
| Keywords:                     | Psoriasis < DERMATOLOGY, PUBLIC HEALTH, EPIDEMIOLOGY                                                                                                                                                                                                                                                                                                                                                                                                                                                                                                                                                          |
|                               |                                                                                                                                                                                                                                                                                                                                                                                                                                                                                                                                                                                                               |

SCHOLARONE™  
Manuscripts

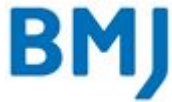

I, the Submitting Author has the right to grant and does grant on behalf of all authors of the Work (as defined in the below author licence), an exclusive licence and/or a non-exclusive licence for contributions from authors who are: i) UK Crown employees; ii) where BMJ has agreed a CC-BY licence shall apply, and/or iii) in accordance with the terms applicable for US Federal Government officers or employees acting as part of their official duties; on a worldwide, perpetual, irrevocable, royalty-free basis to BMJ Publishing Group Ltd ("BMJ") its licensees and where the relevant Journal is co-owned by BMJ to the co-owners of the Journal, to publish the Work in this journal and any other BMJ products and to exploit all rights, as set out in our [licence](#).

The Submitting Author accepts and understands that any supply made under these terms is made by BMJ to the Submitting Author unless you are acting as an employee on behalf of your employer or a postgraduate student of an affiliated institution which is paying any applicable article publishing charge ("APC") for Open Access articles. Where the Submitting Author wishes to make the Work available on an Open Access basis (and intends to pay the relevant APC), the terms of reuse of such Open Access shall be governed by a Creative Commons licence – details of these licences and which [Creative Commons](#) licence will apply to this Work are set out in our licence referred to above.

Other than as permitted in any relevant BMJ Author's Self Archiving Policies, I confirm this Work has not been accepted for publication elsewhere, is not being considered for publication elsewhere and does not duplicate material already published. I confirm all authors consent to publication of this Work and authorise the granting of this licence.

1  
2  
3  
4  
5  
6  
7  
8  
9  
10  
11  
12  
13  
14  
15  
16  
17  
18  
19  
20  
21  
22  
23  
24  
25  
26  
27  
28  
29  
30  
31  
32  
33  
34  
35  
36  
37  
38  
39  
40  
41  
42  
43  
44  
45  
46  
47  
48  
49  
50  
51  
52  
53  
54  
55  
56  
57  
58  
59  
60

# Association between neutrophil to lymphocyte ratio and psoriasis: A cross-sectional study of National Health and Nutrition Examination Survey 2011–2014

Jiixin Hong<sup>1</sup>, Ni Lian<sup>2</sup>, Min Li<sup>1,2</sup>

**Author Affiliation:**

1: School of Public Health, Nanjing Medical University, Nanjing, Jiangsu, 211166, China

2: Jiangsu Key Laboratory of Molecular Biology for Skin Diseases and STIs, Institute of Dermatology, Chinese Academy of Medical Sciences & Peking Union Medical College, Nanjing, 210042, China

**Corresponding author:**

Min Li; Email: [limin@pumcderm.cams.cn](mailto:limin@pumcderm.cams.cn)

**Word count:** 2828

## Abstract

**Objectives:** To investigate the association between the neutrophil to lymphocyte ratio (NLR) and psoriasis using a nationally representative sample of the US population.

**Design:** Cross-sectional study.

**Setting:** National Health and Nutrition Examination Survey 2011–2014.

**Participants:** A subsample of 8387 subjects aged 18 years and older were screened for inclusion, of whom 238 had a diagnosis of psoriasis.

**Primary and secondary outcome measures:** Psoriasis and the degree of psoriasis were defined according to participants' self-report. Weighted logistic regression models, subgroup analysis, and restricted cubic spline (RCS) were built to estimate the potential relationship of NLR with psoriasis.

**Results:** In the fully adjusted models, the fourth quartile of NLR was significantly and positively associated with the presence of psoriasis using the first quartile as reference (OR 2.22, 95%CI 1.27–3.87, P=0.01). Elevated NLR displayed an increase in risk of developing more severe psoriasis for the highest quartile (vs the lowest quartile) with OR of 2.43 (95%CI 1.10–5.36, P=0.003). The association between NLR and psoriasis differed across pre-specified subgroups by age, sex, race, income, and education. A nonlinear correlation of NLR with psoriasis was observed using univariable and multivariable RCS (all P for non-linearity <0.05).

**Conclusions:** Increasing NLR was independently associated with higher risk of psoriasis as well as higher severity of psoriatic lesions, and the link between NLR and the presence of psoriasis was complex and nonlinear. The potential role and value in the clinical diagnosis and prognostic assessment of NLR in psoriasis calls for further longitudinal studies.

**Keywords:** psoriasis; NHANES; public health.

### Strengths and limitations of this study

1. This study included the use of a nationally representative sample and adopted strict methods of statistical adjustment to minimize potential confounding.
2. We have explored and identified for the first time the nonlinear relationship between NLR and psoriasis.
3. Any causal inferences cannot be made as this was a cross-sectional observational study.
4. The observed outcomes may be subject to recall bias because the definition of psoriasis and comorbidities relied on self-reports from the respondents.
5. Unknown and unmeasured confounders may have impacted our estimates.

## Introduction

Psoriasis is a chronic and disfiguring skin disease affecting multiple systems and organs throughout the body that imposes tremendous physical and psychological burdens.<sup>1</sup> Approximately 3% of the population and an estimated 7.5 million adults in the United States have received a diagnosis of psoriasis.<sup>2</sup> It afflicts men and women at all ages in all countries.<sup>3</sup> People living with psoriasis are at a higher risk of developing other severe systemic diseases than is the general population, most commonly cardiovascular diseases and metabolic syndrome. In addition, those with greater psoriasis severity are more susceptible to gastrointestinal discomfort and mood disorders.<sup>4</sup> Psoriasis is an incurable disease with substantial impairment on patients' quality of life, and a large number of people suffer unnecessarily from psoriasis due to poor or delayed diagnosis, inadequate therapy, inappropriate care, and social stigma.<sup>3</sup> Therefore, the pressing need for raised awareness regarding psoriasis should be recognized.

Over the last 2 decades, the systemic inflammatory response induced by T lymphocytes has been considered to be predominant in the etiopathogenesis of psoriasis.<sup>5</sup> The neutrophil to lymphocyte ratio (NLR) is an inexpensive and validated marker of systemic inflammation, which can be readily accessible from existing datasets of routine laboratory tests.<sup>6</sup> The NLR was at first devised to offer a convenient and efficient measure to assess the intensity of systemic inflammation in critically ill patients following stressful events,<sup>7</sup> but later proved to exhibit prognostic value for clinical outcomes in various diseases.<sup>8-11</sup> In recent years, this index has gained much attention owing to its wide availability and ease of access.<sup>12,13</sup> Published study provided evidence that increasing NLR is a risk factor of mortality related to heart disease, chronic lower respiratory disease and kidney disease.<sup>14</sup> A higher NLR has been suggested as a predictor of adverse survival in subjects with cancer.<sup>15</sup> Moreover, there is a rapidly evolving body of literature pointing to the presence of abnormal NLR levels in some psychiatric disorders.<sup>16-18</sup>

Since inflammation serves a pivotal part in the causative mechanisms of psoriasis, several researchers have sought to shed light on the involvement of NLR in psoriasis. Emerging evidence exists that NLR and psoriasis were associated closely.<sup>19-22</sup> However, previous studies were primarily limited by the relatively small enrollment of participants, and results on the relationship between NLR and psoriasis severity remained inconclusive.<sup>23,24</sup> Hence, we processed data from the National Health and Nutrition Examination Survey (NHANES) from 2011 through 2014 to carry out a large-scale study based on the US civilian population. Our purposes were to unravel the potential association of NLR levels with psoriasis, and to clarify whether NLR could be a valuable parameter indicating the inflammatory conditions and the extent of disease in psoriasis patients.

## Methods

### Study design and participants

1  
2  
3 NHANES is a biennial cross-sectional survey with the aim of tracking and evaluating  
4 the health and dietary nutrition status of community-dwelling US population. The  
5 survey employs a complex, multi-stage cluster sampling method to ensure that it is  
6 representative of the nation as a whole. In this study, data from two NHANES cycles  
7 (2011–2012 and 2013–2014) were extracted for investigation, as these two cycles offer  
8 the most updated information on psoriasis. Our analyses were performed in conjunction  
9 with appropriate sampling weights to obtain unbiased estimates from the complicated  
10 NHANES sampling design. We included adult participants and excluded subjects who  
11 had missing or implausible data on self-reported psoriasis, neutrophil count,  
12 lymphocyte count and those with missing covariates. As a result, a total of 8387  
13 individuals were ultimately included in the pool of eligible people. The flowchart of  
14 participant inclusion and exclusion is depicted in Figure 1. NHANES was approved by  
15 the National Center for Health Statistics Institutional Review Board, and participants  
16 provided written informed consent.  
17  
18  
19  
20  
21  
22

### 23 **Diagnosis of psoriasis and measurement of NLR**

24 The outcome was a diagnosis of psoriasis based on a self-reported history of being  
25 told by a physician that they had psoriasis. To evaluate the severity levels of skin  
26 involvement, respondents were then asked to accomplish a set of questionnaires,  
27 containing questions on the extent of psoriasis plaques on the body gauged by palms.  
28 Participants were required to characterize their psoriasis into a category, including (i)  
29 little or no psoriasis, (ii) only a few patches, (iii) scattered patches and (iv) extensive  
30 psoriasis. For the sake of avoiding an increase in sampling error, we merged (ii), (iii),  
31 and (iv), which had smaller frequencies. These survey questionnaires were  
32 administered using the Computer-Assisted Personal Interviewing (CAPI) system by  
33 highly trained personnel.  
34  
35  
36

37 Our predictor variables of prime interest were NLR levels, calculated as dividing the  
38 neutrophil count by the lymphocyte count, which can be derived from laboratory data.  
39 Blood specimen collection was undertaken at the Mobile Examination Centers (MECs).  
40 The Beckman Coulter methodology was applied to figure out complete blood count  
41 parameters.  
42  
43  
44

### 45 **Assessment of covariates**

46 On the basis of published literature, we considered sociodemographic,<sup>25</sup> lifestyle,<sup>26</sup>  
47 and comorbid factors<sup>27,28</sup> that may affect both psoriasis and NLR as potential  
48 confounders, including age, sex, race, poverty income ratio (PIR), education, body  
49 mass index (BMI), smoking, alcohol intake, a history of hypertension, diabetes, and  
50 cardiovascular disease (CVD). We utilized the same terminology as NHANES to  
51 describe racial categories. The PIR was measured by dividing the household's or  
52 individual's income by a specific poverty guideline. we classified the PIR into 3 levels:  
53 low income ( $\leq 1.3$ ), medium income ( $>1.3$  to  $3.5$ ), and high income ( $>3.5$ ). Education  
54 attainment was grouped as high school or less, some college or an AA degree, and  
55 college graduate or above. Smokers were separated into the following categories: never  
56 smokers (those who have either never smoked or have smoked less than 100 cigarettes  
57  
58  
59  
60

1  
2  
3 during their lifetime), former smokers (smoked at least 100 cigarettes but had quit  
4 currently), and current smokers. We defined alcohol drinker as someone who had  
5 consumed at least 12 drinks in any given year. Comorbid conditions were ascertained  
6 by respondent self-reports.  
7  
8  
9

### 10 **Statistical analysis**

11 We used the STROBE cross-sectional checklist when writing our report.<sup>29</sup> We first  
12 compared the baseline characteristics among individuals with and without psoriasis,  
13 using Student's t-test for normally distributed quantitative variables, nonparametric  
14 Kruskal-Wallis test for skewed quantitative variables, and chi-square test for qualitative  
15 variables. Descriptive statistics were presented as mean (SD) or median (interquartile  
16 range) for continuous variables and the number (percentage) of participants for  
17 categorical variables. Binary and multinomial logistic regression models were then  
18 fitted to estimate the relation of NLR with psoriasis and psoriasis lesion severity,  
19 respectively. Three different multivariate models were developed. Model 1 was a basic  
20 unadjusted model. In model 2, adjustments were made for age, sex, ethnicity, PIR, and  
21 educational attainment. Model 3 included all variables in model 2 plus confounding  
22 medical comorbidities. Linear trend tests were done by treating the median  
23 concentration of each NLR quartile as a continuous variable. We entered NLR into  
24 logistic regression analysis as a continuous variable and as a quartile categorical  
25 variable to explore the strength of risk association with psoriasis. Stratified analyses  
26 were conducted using multivariate logistic regression according to age (18–39, 40–59,  
27 60–79, and ≥80 years), sex, race, PIR and education at baseline, incorporating a two-  
28 way interaction term between NLR and subgroup status. Then, we employed restricted  
29 cubic splines (RCS) with 4 knots to model a nonlinear relationship between NLR and  
30 the presence of psoriasis. All analyses were done using the software package R (version  
31 4.1.3). P<0.05 (two-sided) were considered statistically significant.  
32  
33  
34  
35  
36  
37  
38  
39

### 40 **Results**

41  
42 Of 11977 participants aged over 18 years from NHANES 2011-2014 cycles, those  
43 with missing relevant data (n=3590) were excluded from analyses, leaving 238 adults  
44 with psoriasis and 8149 adults without psoriasis for inclusion. 4254 were female  
45 (50.7%), and 4133 were male (49.3%), with an average age of 48.7 years.  
46  
47

48 Table 1 illustrated the demographic, lifestyle and clinical features of included  
49 subjects stratified by the presence and absence of psoriasis. In comparison to the group  
50 without psoriasis, individuals with psoriasis were older (51.3 vs 47.2, P<0.001) and  
51 more likely to be non-Hispanic whites (79.7% vs 68.4%, P=0.001), but less likely to be  
52 current smokers (10.9% vs 20.0%, P<0.001). The prevalence of hypertension (42.2%  
53 vs 32.7%, P=0.032), diabetes (16.7% vs 10.0%, P=0.006), and CVD (12.1% vs 8.2%,  
54 P=0.024) at baseline were higher among participants with psoriasis than those without  
55 psoriasis. In addition, higher levels of NLR were observed in patients who had psoriasis  
56 (2.4 vs 2.0, P<0.001). The group of psoriasis and non-psoriasis did not differ  
57 significantly with regard to sex, income, educational attainment, BMI, and alcohol use.  
58  
59  
60



1  
2  
3 The results of binary logistic regression were summarized in Table 2. In univariate  
4 models, NLR as a continuous variable was associated with 19% increased risk of  
5 psoriasis (OR 1.19, 95%CI 1.11–1.28,  $P<0.001$ ), and the OR for quartile 4 was  
6 significantly higher than the OR for quartile 1 (Q4 vs Q1: OR 2.62, 95%CI 1.58–4.32,  
7  $P_{\text{trend}}<0.001$ ). The association between NLR and psoriasis persisted even after adjusting  
8 for sociodemographic and lifestyle variables (OR 1.16, 95%CI 1.08–1.24,  $P<0.001$ ). In  
9 the fully adjusted models, those with highest quartile of NLR had more than two times  
10 greater odds of having psoriasis than those with the lowest quartile (Q4 vs Q1: OR 2.22,  
11 95%CI 1.27–3.87,  $P=0.01$ ).  
12

13 Findings from the multinomial logistic regression were detailed in Table 3. A  
14 pronounced correlation was found between NLR and the degree of psoriasis, except for  
15 a slight difference that did not attain statistical significance between NLR and those  
16 with little or no psoriasis after adjusting for all variables, regardless of NLR being used  
17 as a continuous (OR 1.08, 95%CI 1.00–1.17,  $P=0.06$ ) or quartile variable (Q4 vs Q1:  
18 OR 2.04, 95%CI 1.00–4.17,  $P=0.052$ ). In all models, the ORs of psoriasis severity  
19 augmented as the quartile of NLR upgraded. Compared to participants with  $\text{NLR}\leq 1.47$   
20 (Q1), those with  $\text{NLR}>2.63$  (Q4) had a significant increase in the odds of “Few patches  
21 to extensive psoriasis” (Q4 vs Q1: OR 2.43, 95%CI 1.10–5.36,  $P=0.003$ ). Elevated  
22 NLR value was associated with higher risk of developing more severe psoriasis.  
23

24 Stratified analyses were undertaken by dividing the participants into pre-specified  
25 subgroups of sociodemographic position at baseline, to assess the consistency of the  
26 relationship between the main predictors and outcome (supplemental table S1).  
27 Increased NLR was a risk factor for the presence of psoriasis in participants aged 40 to  
28 59 (OR 1.28, 95%CI 1.05–1.56,  $P=0.019$ ), and those aged 60 to 79 (OR 1.24, 95%CI  
29 1.09–1.41,  $P=0.004$ ). For each unit increase of NLR, the adjusted OR for psoriasis risk  
30 was 1.22 in female ( $P=0.016$ ), 1.13 in male ( $P=0.03$ ), 1.17 in non-Hispanic white  
31 ( $P=0.006$ ), 2.50 in other race ( $P=0.023$ ), and 1.21 in participants with medium PIR  
32 ( $P=0.021$ ). As for the subgroup stratified by education level, the association of NLR  
33 with psoriasis was non-significant only in the “Some College or AA degree”  
34 stratification (OR 0.96, 95%CI 0.77–1.20,  $P=0.693$ ). Moreover, there was no evidence  
35 of interaction effects between multiple stratification factors and NLR (all  $P$  for  
36 interaction  $>0.1$ ). As displayed in Figure 2, The results of RCS analysis confirmed that  
37 NLR was related with psoriasis in a non-linear manner (all  $P$  for non-linearity  $<0.05$ ).  
38  
39  
40  
41  
42  
43  
44  
45  
46  
47

## 48 Discussion

49 In this observational study, we analyzed standardized data from a large cohort of  
50 participants in a US population sample. Our study identified that the level of NLR was  
51 raised in psoriasis patients and positively correlated with the severity of involvement.  
52 Taking into account that imbalance in the baseline characteristics of participants may  
53 modify the association between NLR and psoriasis, adjustments were made for  
54 potential confounders in regression analysis; nevertheless, we still detected a significant  
55 association of NLR with psoriasis, indicating that this association cannot be solely  
56 attributed to risk factors and that NLR could independently predict either the presence  
57  
58  
59  
60

1  
2  
3 of psoriasis or the severity of psoriatic skin lesions. Furthermore, we also found  
4 evidence that NLR was correlated with psoriasis in a sophisticated nonlinear fashion.

5  
6 Neutrophils and T lymphocytes play a critical role in the development and  
7 progression of psoriasis. Massive infiltration of neutrophils within dermis and  
8 epidermis is one of the classic histological features of psoriasis.<sup>30</sup> As the first line of  
9 defense against immune attack, neutrophils are actively recruited to the affected skin  
10 and responsible for propagating inflammation.<sup>31</sup> Respiratory burst, degranulation and  
11 the neutrophil extracellular traps formation are the main offensive mechanisms of  
12 neutrophils, which contribute to the immunopathogenesis of psoriasis.<sup>32</sup> T lymphocytes  
13 that produce high levels of IL-17 driven by IL-23 has been corroborated as the  
14 pathogenic culprits in psoriasis.<sup>5</sup> IL-17 mediates effects on keratinocytes, which  
15 facilitates recruitment of more IL-17-producing lymphocytes and neutrophils into  
16 inflamed psoriatic lesions, setting up a self-amplifying feedback loop to maintain and  
17 exacerbate the inflammatory events in psoriasis.<sup>5,33</sup> NLR originating from the ratio of  
18 neutrophils to lymphocytes in peripheral blood may have the ability to mirror the  
19 balance between innate and adaptive immune response.<sup>28</sup> Aberrant NLR values are  
20 representative of inflammatory conditions in the body, but as of now there is no  
21 universally acceptable NLR cutoff value that defines its range of normalcy.<sup>34</sup> The  
22 circulating levels of neutrophils and lymphocytes vary from person to person, and  
23 fluctuate over the course of an individual's disease. Besides, patients' medication usage  
24 has an impact on peripheral leukocyte levels. Thus, it remains a challenge to make sure  
25 that NLR become a reasonable and individually standardized predictor of health  
26 outcomes.

27  
28 Recently, a number of investigators have looked into the diagnostic and prognostic  
29 value of NLR in psoriasis. In an observational study comprising of 60 psoriasis patients  
30 along with 50 healthy controls, elevated NLR values were found in patient group when  
31 compared to controls, which is in line with our results.<sup>35</sup> Prior studies have shown that  
32 greater NLR values were associated with higher scores on Psoriasis Area and Severity  
33 Index (PASI).<sup>36,37</sup> Similar findings were mirrored in another study that reported a  
34 significant elevation of NLR in patients with PASI scores of 10 or more compared to  
35 patients with PASI scores of less than 10.<sup>20</sup> Nevertheless, several studies failed to find  
36 significant association between NLR and the clinical severity of psoriasis.<sup>38,39</sup>  
37 Moreover, NLR was proposed to be a robust predictor for the emergence of psoriatic  
38 arthritis in patients who had psoriasis.<sup>20,40,41</sup> It has been reported that NLR was capable  
39 of predicting all-cause mortality and cardiovascular risk,<sup>42</sup> and the index might be a  
40 novel biomarker to assess the risk of subclinical atherosclerosis in patients with  
41 psoriasis.<sup>22,43</sup> NLR was believed to possess the potential of predicting treatment  
42 response, because a remarkable reduction of NLR was observed in psoriasis patients  
43 who received effective treatment.<sup>44,45</sup> As mentioned above, NLR levels were raised in  
44 psoriasis patients and declined after treatment, whereas initial works investigating the  
45 relation of NLR with psoriasis severity produced inconsistent results. These studies  
46 were limited by sample size and bias, and the association between NLR and psoriasis  
47 may be influenced by sociodemographic characteristics,<sup>25</sup> personal health habits,<sup>46,47</sup>  
48 and individual medical history.<sup>48,49</sup> Given that too high or too low levels of NLR might  
49  
50  
51  
52  
53  
54  
55  
56  
57  
58  
59  
60

1  
2  
3 signal a pathological state, there is a strong likelihood of a nonlinear relationship  
4 between NLR and psoriasis, that has not yet been explored and identified in the earlier  
5 researches.  
6

7 Our study has some strengths and clinical implications. Foremost, we used a  
8 nationally representative sample from NHANES, which offered sufficient statistical  
9 power to draw a conclusion and made our findings likely generalizable to the entire US  
10 population. The NHANES database contains comprehensive information on  
11 sociodemographic status, lifestyle exposures, physical measurements, and medical  
12 history, which enabled us to control for numerous confounding factors. Additionally,  
13 NLR is a readily available index and it may assist clinicians in identifying patients at  
14 high risk of severe psoriasis. Despite the large sample size and adjustments for potential  
15 confounders in our study, several limitations should be noted. First, as this was a cross-  
16 sectional observational study, inferences regarding whether this association is or is not  
17 causal cannot be drawn. Additional prospective studies are thus needed to ascertain if  
18 such a longitudinal relationship exists. Furthermore, because the definition of psoriasis  
19 and comorbidities (e.g., hypertension, diabetes, and CVD) relied on self-reports from  
20 the respondents instead of diagnoses made by two or more experienced dermatologists,  
21 the observed outcomes may be subject to recall bias. Second, although we controlled  
22 for multiple potential confounders, unknown and unmeasured confounders may have  
23 impacted our estimates. For instance, immunomodulatory drugs have been linked to  
24 both psoriasis and NLR,<sup>50,51</sup> their usage may influence the correlation between the two.  
25 However, information on the use of immunomodulatory drugs is not available in the  
26 current NHANES data set. Future rigorously designed and sufficiently powered studies  
27 with greater use of immunomodulatory drugs may offer valuable insights into the  
28 complex interplay between psoriasis and NLR.  
29  
30  
31  
32  
33  
34  
35  
36

## 37 **Conclusion**

38 In summary, our study elucidated that NLR was independently associated with psoriasis  
39 and that the association was nonlinear rather than simply linear. We also found evidence  
40 in favor of a clear link between NLR levels and psoriasis severity. NLR, which reflects  
41 a heightened state of systemic inflammation, might become an objective indicator in  
42 conveying warning alerts for patients at risk of severe psoriasis, and be accounted as a  
43 monitoring tool in management of psoriasis. However, further research is warranted to  
44 elaborate the detailed mechanism of NLR in psoriasis.  
45  
46  
47  
48  
49  
50

## 51 **Acknowledgements**

52 We thank all the investigators of National Health and Nutrition Examination Survey  
53 who provided the original data.  
54  
55  
56

## 57 **Author Contributions**

58 JH designed the research, conducted statistical analysis, and wrote the manuscripts. ML  
59  
60

1  
2  
3 and NL directed the study and revised the manuscripts. All authors contributed to the  
4 article and approved the submitted version.  
5  
6  
7

## 8 **Funding**

9  
10 This work was supported by grants from National Natural Science Foundation of China  
11 (82173432), CAMS Innovation Fund for Medical Sciences (2017-I2M-1-017).  
12  
13

14 **Competing interests** None declared.  
15  
16

## 17 **Patient and public involvement**

18  
19 Patients or the public were not involved in the design, or conduct, or reporting, or  
20 dissemination plans of our research.  
21  
22  
23

## 24 **Ethics approval**

25  
26 NHANES was approved by the National Center for Health Statistics Institutional  
27 Review Board, and participants provided written informed consent.  
28  
29  
30

## 31 **Data availability statement**

32  
33 Data are available in a public, open access repository. Open access data are available  
34 on the NHANES website. ([www.cdc.gov/nchs/nhanes/](http://www.cdc.gov/nchs/nhanes/)).  
35  
36  
37  
38  
39  
40  
41  
42  
43  
44  
45  
46  
47  
48  
49  
50  
51  
52  
53  
54  
55  
56  
57  
58  
59  
60

## References

- 1 Boehncke W-H, Schön MP. Psoriasis. *Lancet* 2015; 386:983–94.
- 2 Armstrong AW, Mehta MD, Schupp CW, *et al.* Psoriasis Prevalence in Adults in the United States. *JAMA Dermatol* 2021; 157:940–6.
- 3 Global report on psoriasis. Geneva: World Health Organization, 2016. Available at: <https://apps.who.int/iris/handle/10665/204417> [last accessed 26 April 2023].
- 4 Takeshita J, Grewal S, Langan SM, *et al.* Psoriasis and comorbid diseases: Epidemiology. *J Am Acad Dermatol* 2017; 76:377–390.
- 5 Hawkes JE, Chan TC, Krueger JG. Psoriasis pathogenesis and the development of novel targeted immune therapies. *J Allergy Clin Immunol* 2017; 140:645–53.
- 6 Ferro D, Matias M, Neto J, *et al.* Neutrophil-to-Lymphocyte Ratio Predicts Cerebral Edema and Clinical Worsening Early After Reperfusion Therapy in Stroke. *Stroke* 2021; 52:859–67.
- 7 Zahorec R. Ratio of neutrophil to lymphocyte counts--rapid and simple parameter of systemic inflammation and stress in critically ill. *Bratisl Lek Listy* 2001; 102:5–14.
- 8 Bhindi B, Hermanns T, Wei Y, *et al.* Identification of the best complete blood count-based predictors for bladder cancer outcomes in patients undergoing radical cystectomy. *Br J Cancer* 2016; 114:207–12.
- 9 Liu S, Zheng H, Zhu X, *et al.* Neutrophil-to-lymphocyte ratio is associated with diabetic peripheral neuropathy in type 2 diabetes patients. *Diabetes Res Clin Pract* 2017; 130:90–7.
- 10 Boulos D, Proudman SM, Metcalf RG, *et al.* The neutrophil-lymphocyte ratio in early rheumatoid arthritis and its ability to predict subsequent failure of triple therapy. *Semin Arthritis Rheum* 2019; 49:373–6.
- 11 Liu Y, Du X, Chen J, *et al.* Neutrophil-to-lymphocyte ratio as an independent risk factor for mortality in hospitalized patients with COVID-19. *J Infect* 2020; 81:e6–e12.
- 12 Paliogiannis P, Fois AG, Sotgia S, *et al.* Neutrophil to lymphocyte ratio and clinical outcomes in COPD: recent evidence and future perspectives. *Eur Respir Rev.* 2018; 27:170113.
- 13 Cupp MA, Cariolou M, Tzoulaki I, *et al.* Neutrophil to lymphocyte ratio and cancer prognosis: an umbrella review of systematic reviews and meta-analyses of observational studies. *BMC Med* 2020; 18:360.
- 14 Song M, Graubard BI, Rabkin CS, *et al.* Neutrophil-to-lymphocyte ratio and mortality in the United States general population. *Sci Rep* 2021; 11:464.
- 15 Templeton AJ, McNamara MG, Šeruga B, *et al.* Prognostic role of neutrophil-to-lymphocyte ratio in solid tumors: a systematic review and meta-analysis. *J Natl Cancer Inst* 2014; 106:

- dju124.
- 16 Bhikram T, Sandor P. Neutrophil-lymphocyte ratios as inflammatory biomarkers in psychiatric patients. *Brain Behav Immun* 2022; 105:237–246.
  - 17 Zulfic Z, Weickert CS, Weickert TW, *et al.* Neutrophil-lymphocyte ratio - a simple, accessible measure of inflammation, morbidity and prognosis in psychiatric disorders? *Australas Psychiatry* 2020; 28:454–458.
  - 18 Mazza MG, Lucchi S, Tringali AGM, *et al.* Neutrophil/lymphocyte ratio and platelet/lymphocyte ratio in mood disorders: A meta-analysis. *Pro Neuropsychopharmacol Biol Psychiatry* 2018; 84:229–236.
  - 19 Minakawa S, Kaneko T, Matsuzaki Y, *et al.* Psoriasis Area and Severity Index is closely related to serum C-reactive protein level and neutrophil to lymphocyte ratio in Japanese patients. *J Dermatol* 2017; 44:e236–e237.
  - 20 Kim DS, Shin D, Lee MS, *et al.* Assessments of neutrophil to lymphocyte ratio and platelet to lymphocyte ratio in Korean patients with psoriasis vulgaris and psoriatic arthritis. *J Dermatol* 2016; 43:305–310.
  - 21 Solak B, Dikicier BS, Erdem T. Impact of Elevated Serum Uric Acid Levels on Systemic Inflammation in Patients With Psoriasis. *Angiology* 2017; 68:266–270.
  - 22 Kvist-Hansen A, Kaiser H, Krakauer M, *et al.* Neutrophil-to-lymphocyte ratio and the systemic immune-inflammation index as potential biomarkers of effective treatment and subclinical atherosclerotic cardiovascular disease in patients with psoriasis. *J Eur Acad Dermatol Venereol* 2023; 37:e586–e589.
  - 23 Paliogiannis P, Satta R, Deligia G, *et al.* Associations between the neutrophil-to-lymphocyte and the platelet-to-lymphocyte ratios and the presence and severity of psoriasis: a systematic review and meta-analysis. *Clin Exp Med* 2019; 19:37–45.
  - 24 Dey AK, Teague HL, Adamstein NH, *et al.* Association of neutrophil-to-lymphocyte ratio with non-calcified coronary artery burden in psoriasis: Findings from an observational cohort study. *J Cardiovasc Comput Tomogr* 2021; 15:372–379.
  - 25 Howard R, Scheiner A, Kanetsky PA, *et al.* Sociodemographic and lifestyle factors associated with the neutrophil-to-lymphocyte ratio. *Ann Epidemiol* 2019; 38:11–21.
  - 26 Dai YX, Wang SC, Chou YJ, *et al.* Smoking, but not alcohol, is associated with risk of psoriasis in a Taiwanese population-based cohort study. *J Am Acad Dermatol* 2019; 80:727–734.
  - 27 Bu J, Ding R, Zhou L, *et al.* Epidemiology of Psoriasis and Comorbid Diseases: A Narrative Review. *Front Immunol* 2022; 13:880201.
  - 28 Kim S, Eliot M, Koestler DC, *et al.* Association of Neutrophil-to-Lymphocyte Ratio With

- 1  
2  
3 Mortality and Cardiovascular Disease in the Jackson Heart Study and Modification by the Duffy  
4 Antigen Variant. *JAMA Cardiol* 2018; 3:455–462.  
5  
6  
7 29 von Elm E, Altman DG, Egger M, Pocock SJ, Gøtzsche PC, Vandenbroucke JP. The  
8 Strengthening the Reporting of Observational Studies in Epidemiology (STROBE) Statement:  
9 guidelines for reporting observational studies.  
10  
11  
12 30 Schön MP, Broekaert SM, Erpenbeck L. Sexy again: the renaissance of neutrophils in psoriasis.  
13 *Exp Dermatol* 2017; 26:305–311.  
14  
15  
16 31 Lowes MA, Suárez-Fariñas M, Krueger JG. Immunology of Psoriasis. *Annu Rev Immunol* 2014;  
17 32:227–255.  
18  
19  
20 32 Chiang CC, Cheng WJ, Korinek M, *et al.* Neutrophils in Psoriasis. *Front Immunol* 2019; 10:2376.  
21  
22  
23 33 Chiricozzi A, Romanelli P, Volpe E, *et al.* Scanning the Immunopathogenesis of Psoriasis. *Int J*  
24 *Mol Sci* 2018; 19:179.  
25  
26  
27 34 Buonacera A, Stancanelli B, Colaci M, *et al.* Neutrophil to Lymphocyte Ratio: An Emerging  
28 Marker of the Relationships between the Immune System and Diseases. *Int J Mol Sci* 2022;  
29 23:3636.  
30  
31  
32 35 Sirin MC, Korkmaz S, Erturan I, *et al.* Evaluation of monocyte to HDL cholesterol ratio and  
33 other inflammatory markers in patients with psoriasis. *An Bras Dermatol* 2020; 95:575–582.  
34  
35  
36 36 Polat M, Bugdayci G, Kaya H, *et al.* Evaluation of neutrophil-to-lymphocyte ratio and platelet-  
37 to-lymphocyte ratio in Turkish patients with chronic plaque psoriasis. *Acta Dermatovenerol Alp*  
38 *Pannonica Adriat* 2017; 26:97–100.  
39  
40  
41 37 Sen BB, Rifaioglu EN, Ekiz O, *et al.* Neutrophil to lymphocyte ratio as a measure of systemic  
42 inflammation in psoriasis. *Cutan Ocul Toxicol* 2014; 33:223–227.  
43  
44  
45 38 Ataseven A, Bilgin AU, Kurtipek GS. The Importance of Neutrophil Lymphocyte Ratio In  
46 Patients With Psoriasis. *Mater Sociomed* 2014; 26:231–233.  
47  
48  
49 39 Paliogiannis P, Satta R, Deligia G, *et al.* Associations between the neutrophil-to-lymphocyte and  
50 the platelet-to-lymphocyte ratios and the presence and severity of psoriasis: a systematic review  
51 and meta-analysis. *Clin Exp Med* 2019; 19:37–45.  
52  
53  
54 40 Nguyen HT, Vo LDH, Pham NN. Neutrophil-to-lymphocyte and platelet-to-lymphocyte ratios  
55 as inflammatory markers in psoriasis: a case-control study. *Dermatol Reports* 2022; 15:9516.  
56  
57  
58 41 Duran TI, Pamukcu M. Relationship between disease impact scores and C-reactive  
59 protein/albumin ratio in patients with psoriatic arthritis. *Croat Med J* 2022; 63:141–147.  
60  
61  
62 42 Adamstein NH, MacFadyen JG, Rose LM, *et al.* The neutrophil-lymphocyte ratio and incident  
63 atherosclerotic events: analyses from five contemporary randomized trials. *Eur Heart J* 2021;  
64 42:896–903.

- 1  
2  
3 43 Kaiser H, Wang X, Kvist-Hansen A, *et al.* Biomarkers of subclinical atherosclerosis in patients  
4 with psoriasis. *Sci Rep* 2021; 11:21438.  
5  
6  
7 44 Zhang L, Wiles C, Martinez LR, *et al.* Neutrophil-to-lymphocyte ratio decreases after treatment  
8 of psoriasis with therapeutic antibodies. *J Eur Acad Dermatol Venereol* 2017; 31:e491–e492.  
9  
10  
11 45 Andersen CSB, Kvist-Hansen A, Siewertsen M, *et al.* Blood Cell Biomarkers of Inflammation  
12 and Cytokine Levels as Predictors of Response to Biologics in Patients with Psoriasis. *Int J Mol*  
13 *Sci* 2023; 24:6111.  
14  
15  
16 46 Budu-Aggrey A, Brumpton B, Tyrrell J, *et al.* Evidence of a causal relationship between body  
17 mass index and psoriasis: A mendelian randomization study. *PLoS Med* 2019; 16:e1002739.  
18  
19  
20 47 Wei J, Zhu J, Xu H, *et al.* Alcohol consumption and smoking in relation to psoriasis: a Mendelian  
21 randomization study. *Br J Dermatol* 2022; 187:684–691.  
22  
23  
24 48 Miller IM, Ellervik C, Yazdanyar S, *et al.* Meta-analysis of psoriasis, cardiovascular disease, and  
25 associated risk factors. *J Am Acad Dermatol* 2013; 69:1014–1024.  
26  
27  
28 49 Zahorec R. Neutrophil-to-lymphocyte ratio, past, present and future perspectives. *Bratisl Lek*  
29 *Listy* 2021; 122:474–488.  
30  
31  
32 50 Blayney DW, Mohanlal R, Adamchuk H, *et al.* Efficacy of Plinabulin vs Pegfilgrastim for  
33 Prevention of Docetaxel-Induced Neutropenia in Patients With Solid Tumors: A Randomized  
34 Clinical Trial. *JAMA Netw Open* 2022; 5:e2145446.  
35  
36  
37 51 Loos AM, Liu S, Segel C, *et al.* Comparative effectiveness of targeted immunomodulators for  
38 the treatment of moderate-to-severe plaque psoriasis: A systematic review and network meta-  
39 analysis. *J Am Acad Dermatol* 2018; 79:135-144.e7.  
40  
41  
42  
43  
44  
45  
46  
47  
48  
49  
50  
51  
52  
53  
54  
55  
56  
57  
58  
59  
60



1  
2  
3  
4  
5  
6  
7  
8  
9  
10  
11  
12  
13  
14  
15  
16  
17  
18  
19  
20  
21  
22  
23  
24  
25  
26  
27  
28  
29  
30  
31  
32  
33  
34  
35  
36  
37  
38  
39  
40  
41  
42  
43  
44  
45  
46  
47  
48  
49  
50  
51  
52  
53  
54  
55  
56  
57  
58  
59  
60

### Figure legends

**Figure 1.** Flow diagram of participants screened from National Health and Nutrition Examination Survey (NHANES) 2011 to 2014.

Covariates included age, sex, race, income, education, body mass index, smoking, alcohol use, history of hypertension, diabetes and cardiovascular disease.

**Figure 2.** Nonlinear association between NLR and psoriasis by restricted cubic spline regression.

Fitted regression line was shown as red solid line; black dashed lines indicated where the OR equals 1; 95%CI is represented by shaded region.

**Table 1** Baseline characteristics of participants with and without psoriasis.

| Characteristic            | Without psoriasis<br>(n=8149) | With psoriasis<br>(n=238) | P value |
|---------------------------|-------------------------------|---------------------------|---------|
| Age, mean (SD), y         | 47.2 (17.0)                   | 51.3 (15.4)               | <0.001  |
| Sex                       |                               |                           | 0.408   |
| Female                    | 4128 (51.0)                   | 126 (53.8)                |         |
| Male                      | 4021 (49.0)                   | 112 (46.2)                |         |
| Race                      |                               |                           | 0.001   |
| Mexican American          | 904 (7.9)                     | 15 (4.1)                  |         |
| Other Hispanic            | 759 (5.8)                     | 24 (5.1)                  |         |
| Non-Hispanic White        | 3467 (68.4)                   | 136 (79.7)                |         |
| Non-Hispanic Black        | 1842 (10.7)                   | 28 (4.8)                  |         |
| Non-Hispanic Asian        | 931 (4.6)                     | 26 (4.0)                  |         |
| Other Race                | 246 (2.6)                     | 9 (2.3)                   |         |
| Poverty income ratio      |                               |                           | 0.81    |
| Low                       | 2793 (23.9)                   | 84 (22.7)                 |         |
| Medium                    | 2800 (34.5)                   | 76 (33.8)                 |         |
| High                      | 2556 (41.6)                   | 78 (43.5)                 |         |
| Education                 |                               |                           | 0.405   |
| High school or less       | 3444 (35.4)                   | 91 (30.4)                 |         |
| Some college or AA degree | 2559 (32.8)                   | 79 (33.4)                 |         |
| College graduate or above | 2146 (31.8)                   | 68 (36.2)                 |         |
| BMI                       |                               |                           | 0.071   |
| Underweight (<18.5)       | 133 (1.4)                     | 0 (0.0)                   |         |
| Normal (18.5 to <25)      | 2382 (28.8)                   | 52 (20.8)                 |         |
| Overweight (25 to <30)    | 2618 (33.2)                   | 89 (41.6)                 |         |
| Obese (30 or greater)     | 3016 (36.6)                   | 97 (37.6)                 |         |
| Smoking status            |                               |                           | <0.001  |

|    |                 |                |                |        |
|----|-----------------|----------------|----------------|--------|
| 1  |                 |                |                |        |
| 2  |                 |                |                |        |
| 3  | Never smoker    | 4594 (56.2)    | 121 (49.4)     |        |
| 4  | Former smoker   | 1888 (23.9)    | 82 (39.7)      |        |
| 5  | Current smoker  | 1667 (20.0)    | 35 (10.9)      |        |
| 6  |                 |                |                |        |
| 7  | Alcohol drinker |                |                | 0.899  |
| 8  | No              | 2157 (20.6)    | 65 (20.3)      |        |
| 9  | Yes             | 5992 (79.4)    | 173 (79.7)     |        |
| 10 |                 |                |                |        |
| 11 | Hypertension    |                |                | 0.032  |
| 12 | No              | 5207 (67.3)    | 129 (57.8)     |        |
| 13 | Yes             | 2942 (32.7)    | 109 (42.2)     |        |
| 14 |                 |                |                |        |
| 15 | Diabetes        |                |                | 0.006  |
| 16 | No              | 7090 (90.0)    | 190 (83.3)     |        |
| 17 | Yes             | 1059 (10.0)    | 48 (16.7)      |        |
| 18 |                 |                |                |        |
| 19 | History of CVD  |                |                | 0.024  |
| 20 | No              | 7352 (91.8)    | 197 (87.9)     |        |
| 21 | Yes             | 797 (8.2)      | 41 (12.1)      |        |
| 22 |                 |                |                |        |
| 23 | NLR             | 2.0 (1.5, 2.6) | 2.4 (1.8, 3.2) | <0.001 |

24 Median (SD) or median (interquartile range) for continuous; n (%) for categorical.

25 Abbreviation: BMI, body mass index; CVD, cardiovascular disease; NLR, neutrophil to  
 26 lymphocyte ratio.  
 27  
 28  
 29  
 30  
 31  
 32  
 33  
 34  
 35  
 36  
 37  
 38  
 39  
 40  
 41  
 42  
 43  
 44  
 45  
 46  
 47  
 48  
 49  
 50  
 51  
 52  
 53  
 54  
 55  
 56  
 57  
 58  
 59  
 60

**Table 2** Association between neutrophil to lymphocyte ratio (NLR) and the presence of psoriasis.

| Variable           | Model 1           |         | Model 2           |         | Model 3           |         |
|--------------------|-------------------|---------|-------------------|---------|-------------------|---------|
|                    | OR (95% CI)       | P value | OR (95% CI)       | P value | OR (95% CI)       | P value |
| NLR (continuous)   | 1.19 (1.11, 1.28) | <0.001  | 1.16 (1.08, 1.24) | <0.001  | 1.15 (1.05, 1.25) | 0.006   |
| NLR (quartile)     |                   |         |                   |         |                   |         |
| Q1 ( $\leq 1.47$ ) | Reference         |         | Reference         |         | Reference         |         |
| Q2 (1.47–1.96)     | 1.14 (0.67, 1.94) | 0.613   | 1.05 (0.61, 1.82) | 0.849   | 1.05 (0.59, 1.89) | 0.848   |
| Q3 (1.96–2.63)     | 1.48 (0.93, 2.36) | 0.095   | 1.34 (0.83, 2.18) | 0.218   | 1.31 (0.77, 2.24) | 0.282   |
| Q4 ( $> 2.63$ )    | 2.62 (1.58, 4.32) | <0.001  | 2.25 (1.35, 3.76) | 0.004   | 2.22 (1.27, 3.87) | 0.01    |
| P for trend        | <0.001            |         | 0.001             |         | 0.004             |         |

Model 1: no covariates were adjusted. Model 2: adjusted for age, sex, race, income, education. Model 3: adjusted for age, sex, race, income, education, body mass index, smoking status, alcohol use, history of hypertension, diabetes and cardiovascular disease.

**Table 3** Association between neutrophil to lymphocyte ratio (NLR) and the degree of psoriasis.

| Model   | Psoriasis severity                 | Continuous OR (95% CI) | P value | OR (95%CI) |                   |                   |                   | P value |
|---------|------------------------------------|------------------------|---------|------------|-------------------|-------------------|-------------------|---------|
|         |                                    |                        |         | Q1         | Q2                | Q3                | Q4                |         |
| Model 1 | Little or no psoriasis             | 1.13 (1.06, 1.21)      | <0.001  | Reference  | 1.30 (0.59, 2.85) | 1.81 (0.97, 3.35) | 2.41 (1.30, 4.48) | 0.01    |
| Model 2 | Few patches to extensive psoriasis | 1.22 (1.11, 1.34)      | <0.001  | Reference  | 0.95 (0.37, 2.44) | 1.09 (0.47, 2.55) | 2.86 (1.34, 6.07) | <0.001  |
| Model 3 | Little or no psoriasis             | 1.10 (1.03, 1.18)      | 0.008   | Reference  | 1.18 (0.52, 2.72) | 1.62 (0.85, 3.09) | 2.07 (1.08, 3.96) | 0.034   |
| Model 4 | Few patches to extensive psoriasis | 1.20 (1.10, 1.31)      | <0.001  | Reference  | 0.89 (0.35, 2.29) | 1.00 (0.41, 2.44) | 2.49 (1.17, 5.29) | 0.003   |
| Model 5 | Little or no psoriasis             | 1.08 (1.00, 1.17)      | 0.06    | Reference  | 1.21 (0.49, 2.96) | 1.61 (0.80, 3.22) | 2.04 (1.00, 4.17) | 0.052   |
| Model 6 | Few patches to extensive psoriasis | 1.19 (1.07, 1.33)      | 0.004   | Reference  | 0.88 (0.33, 2.34) | 0.95 (0.36, 2.54) | 2.43 (1.10, 5.36) | 0.003   |

In multinomial logistic regression models, association between NLR and psoriasis severity was tested with patients never diagnosed with psoriasis as the reference group. Q1, NLR $\leq$ 1.47; Q2, NLR 1.47–1.96; Q3, NLR 1.96–2.63; Q4, NLR $>$ 2.63.

1  
2  
3  
4  
5  
6  
7  
8  
9  
10  
11  
12  
13  
14  
15  
16  
17  
18  
19  
20  
21  
22  
23  
24  
25  
26  
27  
28  
29  
30  
31  
32  
33  
34  
35  
36  
37  
38  
39  
40  
41  
42  
43  
44  
45  
46  
47  
48  
49  
50  
51  
52  
53  
54  
55  
56  
57  
58  
59  
60

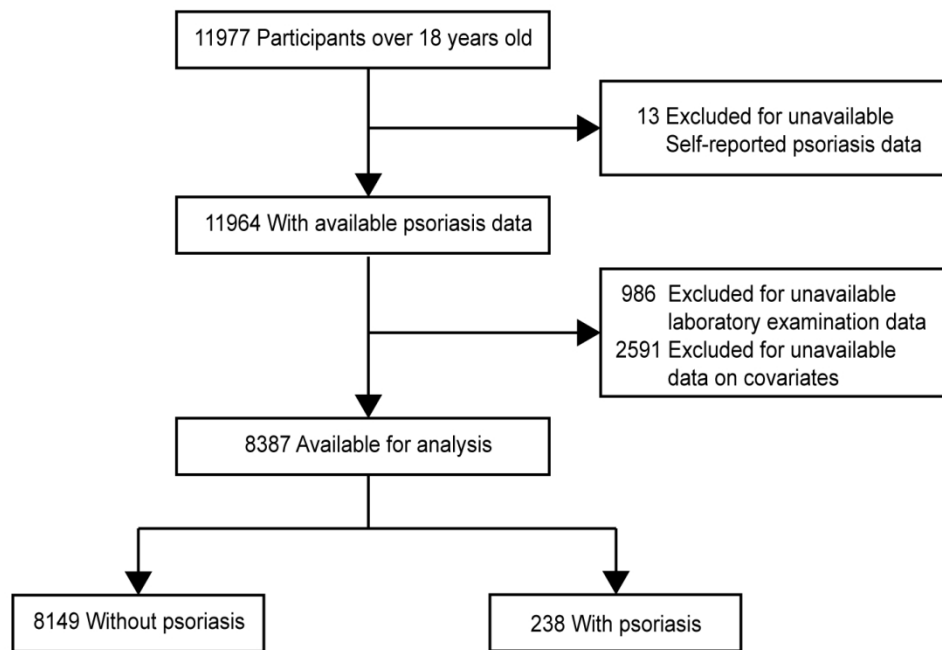

Figure 1. Flow diagram of participants screened from National Health and Nutrition Examination Survey (NHANES) 2011 to 2014. Covariates included age, sex, race, income, education, body mass index, smoking, alcohol use, history of hypertension, diabetes and cardiovascular disease.

129x91mm (300 x 300 DPI)

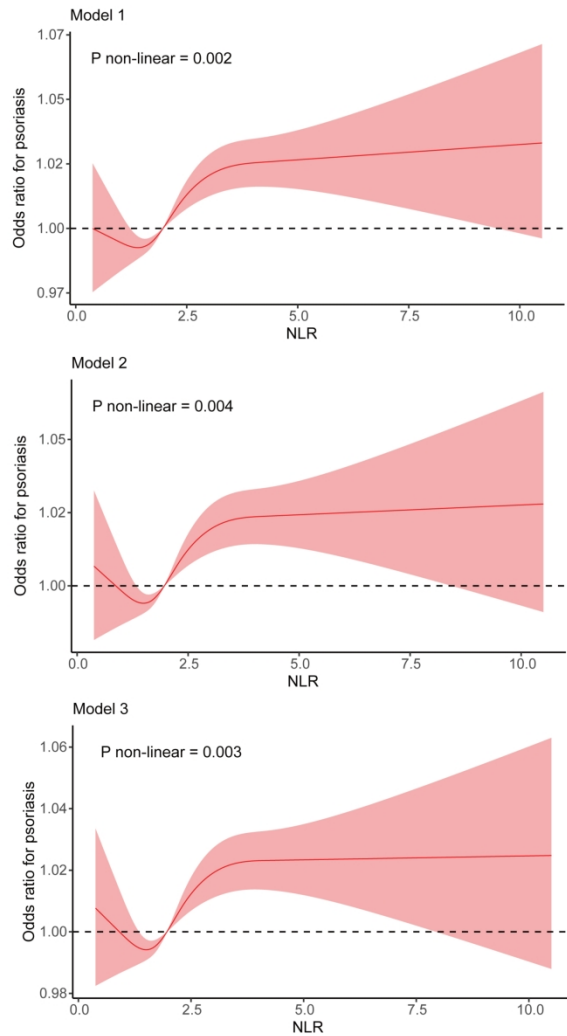

Figure 2. Nonlinear association between NLR and psoriasis by restricted cubic spline regression. Fitted regression line was shown as red solid line; black dashed lines indicated where the OR equals 1; 95%CI is represented by shaded region.

210x297mm (300 x 300 DPI)

**Table S1** Subgroup analysis for the association between neutrophil to lymphocyte ratio (NLR) as a continuous variable and the presence of psoriasis.

| Subgroup                  | OR (95%CI)        | P value | P for interaction |
|---------------------------|-------------------|---------|-------------------|
| Age, y                    |                   |         | 0.118             |
| 18-39                     | 1.01 (0.74, 1.37) | 0.972   |                   |
| 40-59                     | 1.28 (1.05, 1.56) | 0.019   |                   |
| 60-79                     | 1.24 (1.09, 1.41) | 0.004   |                   |
| ≥80                       | 0.99 (0.82, 1.19) | 0.921   |                   |
| Sex                       |                   |         | 0.301             |
| Female                    | 1.22 (1.05, 1.43) | 0.016   |                   |
| Male                      | 1.13 (1.01, 1.25) | 0.03    |                   |
| Race                      |                   |         | 0.984             |
| Mexican American          | 1.04 (0.86, 1.25) | 0.613   |                   |
| Other Hispanic            | 1.17 (0.83, 1.64) | 0.331   |                   |
| Non-Hispanic White        | 1.17 (1.05, 1.30) | 0.006   |                   |
| Non-Hispanic Black        | 1.16 (0.96, 1.39) | 0.114   |                   |
| Non-Hispanic Asian        | 1.14 (0.74, 1.76) | 0.522   |                   |
| Other Race                | 2.50 (1.17, 5.34) | 0.023   |                   |
| Poverty income ratio      |                   |         | 0.63              |
| Low                       | 1.09 (0.88, 1.35) | 0.397   |                   |
| Medium                    | 1.21 (1.03, 1.41) | 0.021   |                   |
| High                      | 1.14 (0.93, 1.39) | 0.185   |                   |
| Education                 |                   |         | 0.181             |
| High school or less       | 1.18 (1.07, 1.31) | 0.004   |                   |
| Some college or AA degree | 0.96 (0.77, 1.20) | 0.693   |                   |
| College graduate or above | 1.26 (1.05, 1.52) | 0.019   |                   |

Each stratification was adjusted for all covariates except the stratification factor itself.



**STROBE 2007 (v4) Statement—Checklist of items that should be included in reports of *cross-sectional studies***

| Section/Topic                | Item # | Recommendation                                                                                                                                                                       | Reported on page # |
|------------------------------|--------|--------------------------------------------------------------------------------------------------------------------------------------------------------------------------------------|--------------------|
| <b>Title and abstract</b>    | 1      | (a) Indicate the study's design with a commonly used term in the title or the abstract                                                                                               | 1                  |
|                              |        | (b) Provide in the abstract an informative and balanced summary of what was done and what was found                                                                                  | 2                  |
| <b>Introduction</b>          |        |                                                                                                                                                                                      |                    |
| Background/rationale         | 2      | Explain the scientific background and rationale for the investigation being reported                                                                                                 | 3                  |
| Objectives                   | 3      | State specific objectives, including any prespecified hypotheses                                                                                                                     | 3                  |
| <b>Methods</b>               |        |                                                                                                                                                                                      |                    |
| Study design                 | 4      | Present key elements of study design early in the paper                                                                                                                              | 4                  |
| Setting                      | 5      | Describe the setting, locations, and relevant dates, including periods of recruitment, exposure, follow-up, and data collection                                                      | 4                  |
| Participants                 | 6      | (a) Give the eligibility criteria, and the sources and methods of selection of participants                                                                                          | 4                  |
| Variables                    | 7      | Clearly define all outcomes, exposures, predictors, potential confounders, and effect modifiers. Give diagnostic criteria, if applicable                                             | 4                  |
| Data sources/<br>measurement | 8*     | For each variable of interest, give sources of data and details of methods of assessment (measurement). Describe comparability of assessment methods if there is more than one group | 4-5                |
| Bias                         | 9      | Describe any efforts to address potential sources of bias                                                                                                                            | 4                  |
| Study size                   | 10     | Explain how the study size was arrived at                                                                                                                                            | 4                  |
| Quantitative variables       | 11     | Explain how quantitative variables were handled in the analyses. If applicable, describe which groupings were chosen and why                                                         | 5                  |
| Statistical methods          | 12     | (a) Describe all statistical methods, including those used to control for confounding                                                                                                | 5                  |
|                              |        | (b) Describe any methods used to examine subgroups and interactions                                                                                                                  | 5                  |
|                              |        | (c) Explain how missing data were addressed                                                                                                                                          | N/A                |
|                              |        | (d) If applicable, describe analytical methods taking account of sampling strategy                                                                                                   | 4,5                |
|                              |        | (e) Describe any sensitivity analyses                                                                                                                                                | 5                  |
| <b>Results</b>               |        |                                                                                                                                                                                      |                    |

|                          |     |                                                                                                                                                                                                              |     |
|--------------------------|-----|--------------------------------------------------------------------------------------------------------------------------------------------------------------------------------------------------------------|-----|
| Participants             | 13* | (a) Report numbers of individuals at each stage of study—eg numbers potentially eligible, examined for eligibility, confirmed eligible, included in the study, completing follow-up, and analysed            | 5   |
|                          |     | (b) Give reasons for non-participation at each stage                                                                                                                                                         | N/A |
|                          |     | (c) Consider use of a flow diagram                                                                                                                                                                           | 4   |
| Descriptive data         | 14* | (a) Give characteristics of study participants (eg demographic, clinical, social) and information on exposures and potential confounders                                                                     | 5   |
|                          |     | (b) Indicate number of participants with missing data for each variable of interest                                                                                                                          | 4,5 |
| Outcome data             | 15* | Report numbers of outcome events or summary measures                                                                                                                                                         | 5   |
| Main results             | 16  | (a) Give unadjusted estimates and, if applicable, confounder-adjusted estimates and their precision (eg, 95% confidence interval). Make clear which confounders were adjusted for and why they were included | 6   |
|                          |     | (b) Report category boundaries when continuous variables were categorized                                                                                                                                    | 6   |
|                          |     | (c) If relevant, consider translating estimates of relative risk into absolute risk for a meaningful time period                                                                                             | N/A |
| Other analyses           | 17  | Report other analyses done—eg analyses of subgroups and interactions, and sensitivity analyses                                                                                                               | 6   |
| <b>Discussion</b>        |     |                                                                                                                                                                                                              |     |
| Key results              | 18  | Summarise key results with reference to study objectives                                                                                                                                                     | 6-7 |
| Limitations              | 19  | Discuss limitations of the study, taking into account sources of potential bias or imprecision. Discuss both direction and magnitude of any potential bias                                                   | 8   |
| Interpretation           | 20  | Give a cautious overall interpretation of results considering objectives, limitations, multiplicity of analyses, results from similar studies, and other relevant evidence                                   | 7-8 |
| Generalisability         | 21  | Discuss the generalisability (external validity) of the study results                                                                                                                                        | 8   |
| <b>Other information</b> |     |                                                                                                                                                                                                              |     |
| Funding                  | 22  | Give the source of funding and the role of the funders for the present study and, if applicable, for the original study on which the present article is based                                                | 9   |

\*Give information separately for cases and controls in case-control studies and, if applicable, for exposed and unexposed groups in cohort and cross-sectional studies.

**Note:** An Explanation and Elaboration article discusses each checklist item and gives methodological background and published examples of transparent reporting. The STROBE checklist is best used in conjunction with this article (freely available on the Web sites of PLoS Medicine at <http://www.plosmedicine.org/>, Annals of Internal Medicine at <http://www.annals.org/>, and Epidemiology at <http://www.epidem.com/>). Information on the STROBE Initiative is available at [www.strobe-statement.org](http://www.strobe-statement.org).

# BMJ Open

## Association between the neutrophil-to-lymphocyte ratio and psoriasis: A cross-sectional study of the National Health and Nutrition Examination Survey 2011–2014

|                                 |                                                                                                                                                                                                                                                                                                                                                                                                                                                               |
|---------------------------------|---------------------------------------------------------------------------------------------------------------------------------------------------------------------------------------------------------------------------------------------------------------------------------------------------------------------------------------------------------------------------------------------------------------------------------------------------------------|
| Journal:                        | <i>BMJ Open</i>                                                                                                                                                                                                                                                                                                                                                                                                                                               |
| Manuscript ID                   | bmjopen-2023-077596.R1                                                                                                                                                                                                                                                                                                                                                                                                                                        |
| Article Type:                   | Original research                                                                                                                                                                                                                                                                                                                                                                                                                                             |
| Date Submitted by the Author:   | 13-Oct-2023                                                                                                                                                                                                                                                                                                                                                                                                                                                   |
| Complete List of Authors:       | Hong, Jiaxin; Nanjing Medical University, School of Public Health<br>Lian, Ni; Chinese Academy of Medical Sciences Institute of Dermatology,<br>Jiangsu Key Laboratory of Molecular Biology for Skin Disease and STIs<br>Li, Min; Chinese Academy of Medical Sciences Institute of Dermatology,<br>Jiangsu Key Laboratory of Molecular Biology for Skin Diseases and STIs;<br>Nanjing Medical University School of Public Health, Center for Global<br>Health |
| <b>Primary Subject Heading</b>: | Dermatology                                                                                                                                                                                                                                                                                                                                                                                                                                                   |
| Secondary Subject Heading:      | Public health, Epidemiology                                                                                                                                                                                                                                                                                                                                                                                                                                   |
| Keywords:                       | Psoriasis < DERMATOLOGY, PUBLIC HEALTH, EPIDEMIOLOGY                                                                                                                                                                                                                                                                                                                                                                                                          |
|                                 |                                                                                                                                                                                                                                                                                                                                                                                                                                                               |

SCHOLARONE™  
Manuscripts



I, the Submitting Author has the right to grant and does grant on behalf of all authors of the Work (as defined in the below author licence), an exclusive licence and/or a non-exclusive licence for contributions from authors who are: i) UK Crown employees; ii) where BMJ has agreed a CC-BY licence shall apply, and/or iii) in accordance with the terms applicable for US Federal Government officers or employees acting as part of their official duties; on a worldwide, perpetual, irrevocable, royalty-free basis to BMJ Publishing Group Ltd ("BMJ") its licensees and where the relevant Journal is co-owned by BMJ to the co-owners of the Journal, to publish the Work in this journal and any other BMJ products and to exploit all rights, as set out in our [licence](#).

The Submitting Author accepts and understands that any supply made under these terms is made by BMJ to the Submitting Author unless you are acting as an employee on behalf of your employer or a postgraduate student of an affiliated institution which is paying any applicable article publishing charge ("APC") for Open Access articles. Where the Submitting Author wishes to make the Work available on an Open Access basis (and intends to pay the relevant APC), the terms of reuse of such Open Access shall be governed by a Creative Commons licence – details of these licences and which [Creative Commons](#) licence will apply to this Work are set out in our licence referred to above.

Other than as permitted in any relevant BMJ Author's Self Archiving Policies, I confirm this Work has not been accepted for publication elsewhere, is not being considered for publication elsewhere and does not duplicate material already published. I confirm all authors consent to publication of this Work and authorise the granting of this licence.

1  
2  
3  
4  
5 **Association between the neutrophil-to-lymphocyte ratio and**  
6  
7 **psoriasis: A cross-sectional study of the National Health and**  
8  
9 **Nutrition Examination Survey 2011–2014**  
10  
11  
12

13 Jiaxin Hong<sup>1</sup>, Ni Lian<sup>2</sup>, Min Li<sup>1,2</sup>

14 **Author Affiliation:**

15 1: Nanjing Medical University, School of Public Health, Nanjing, Jiangsu, China

16 2: Chinese Academy of Medical Sciences Institute of Dermatology, Jiangsu Key  
17 Laboratory of Molecular Biology for Skin Diseases and STIs, Nanjing, Jiangsu, China

18 **Corresponding author:**

19 Min Li; Email: [limin@pumcderm.cams.cn](mailto:limin@pumcderm.cams.cn)

20 **Word count:** 3138  
21  
22  
23  
24  
25  
26  
27  
28  
29  
30  
31  
32  
33  
34  
35  
36  
37  
38  
39  
40  
41  
42  
43  
44  
45  
46  
47  
48  
49  
50  
51  
52  
53  
54  
55  
56  
57  
58  
59  
60

## Abstract

**Objectives:** To investigate the association between the neutrophil-to-lymphocyte ratio (NLR) and psoriasis.

**Design:** Cross-sectional study.

**Setting:** National Health and Nutrition Examination Survey 2011–2014.

**Participants:** A subsample of 8387 individuals aged 18 years and older were screened for inclusion, of whom 238 reported a diagnosis of psoriasis.

**Primary and secondary outcome measures:** Psoriasis and the severity of psoriasis were defined according to participants' self-reports. Weighted logistic regression, subgroup, and restricted cubic spline (RCS) analyses were conducted to estimate the potential relationship of the NLR with psoriasis.

**Results:** In the fully adjusted models, the fourth quartile of the NLR was significantly and positively associated with the presence of psoriasis using the first quartile as a reference (OR 2.22, 95% CI 1.27–3.87, P=0.01). Elevated NLR was associated with an increased odds of having more severe psoriasis for the highest quartile (vs. the lowest quartile), with an OR of 2.43 (95% CI 1.10–5.36, P=0.003). The association between the NLR and psoriasis differed across prespecified subgroups by age, sex, race, income, and education. A nonlinear correlation of the NLR with psoriasis was observed using univariable and multivariable RCS (all P for nonlinearity <0.05).

**Conclusions:** The NLR was nonlinearly and positively correlated with the presence of psoriasis, and our findings suggest a significant association between the NLR and the severity of psoriasis. The potential role and value in the clinical diagnosis and prognostic assessment of the NLR in psoriasis calls for further longitudinal studies.

**Keywords:** psoriasis; NHANES; public health.

### Strengths and limitations of this study

1. This study included the use of a nationally representative sample and adopted strict methods of statistical adjustment to minimize potential confounding.
2. We have explored and identified for the first time the nonlinear relationship between the NLR and psoriasis.
3. Causal inferences cannot be made, as this was a cross-sectional observational study.
4. The observed outcomes may be subject to recall bias because the diagnosis and severity of psoriasis were based on respondents' self-reports.
5. Unknown and unmeasured confounders may have impacted our estimates.

## Introduction

Psoriasis is a chronic and disfiguring skin disease affecting multiple systems and organs throughout the body that imposes tremendous physical and psychological burdens (1). Approximately 3% of the population and an estimated 7.5 million adults in the United States have received a diagnosis of psoriasis (2). It afflicts men and women at all ages in all countries (3). People living with psoriasis are at a higher risk of developing other severe systemic diseases than the general population, most commonly cardiovascular diseases and metabolic syndrome. Numerous studies have suggested associations between psoriasis and other comorbidities, such as gastrointestinal disease, kidney disease, malignancy, and mood disorders (4). Psoriasis is an incurable disease that substantially impairs patients' quality of life, and a large number of people suffer unnecessarily from psoriasis due to poor or delayed diagnosis, inadequate therapy, inappropriate care, and social stigma (3). Therefore, the pressing need for increased awareness regarding psoriasis should be recognized.

Over the last 2 decades, the systemic inflammatory response induced by T lymphocytes has been considered to be predominant in the etiopathogenesis of psoriasis (5). The neutrophil-to-lymphocyte ratio (NLR) is an inexpensive and validated marker of systemic inflammation that can be readily calculated from existing datasets of routine laboratory tests (6). The NLR was first devised to offer a convenient and efficient measure to assess the intensity of systemic inflammation in critically ill patients following stressful events (7) but later proved to exhibit prognostic value for clinical outcomes in various diseases (8-11). In recent years, this index has gained much attention owing to its wide availability and ease of access (12, 13). A published study has reported that an increasing NLR is a risk factor for mortality related to heart disease, chronic lower respiratory disease and kidney disease (14). An increased NLR has been suggested as a predictor of poor survival in individuals with cancer (15). Moreover, there is a rapidly evolving body of literature indicating the presence of abnormal NLR in some psychiatric disorders (16-18).

Since inflammation plays a pivotal role in the causative mechanisms of psoriasis, several researchers have sought to shed light on the involvement of the NLR in psoriasis. Emerging evidence indicates that the NLR and psoriasis are closely associated (19-22). However, previous studies were primarily limited by the relatively small enrolment of participants, and results on the relationship between the NLR and psoriasis severity remain inconclusive (23, 24). Hence, we processed data from the National Health and Nutrition Examination Survey (NHANES) from 2011 through 2014 to carry out a large-scale study based on the US civilian population. Our purposes were to unravel the potential association of the NLR with psoriasis, and to clarify whether the NLR could be a valuable parameter indicating the extent of inflammation and disease in psoriasis patients.

## Methods

### Study design and participants

1  
2  
3 The NHANES is a biennial cross-sectional survey with the aim of tracking and  
4 evaluating the health and dietary nutrition status of community-dwelling US  
5 populations (25). The survey employs a complex, multistage cluster sampling method  
6 to ensure that it is representative of the nation as a whole (26). In this study, data from  
7 two NHANES cycles (2011–2012 and 2013–2014) were extracted for investigation, as  
8 these two cycles offer the most updated information on psoriasis (27). Our analyses  
9 were performed in conjunction with appropriate sampling weights to obtain unbiased  
10 estimates from the complicated NHANES sampling design (26). We included adult  
11 participants and excluded individuals who had missing or implausible data on self-  
12 reported psoriasis, neutrophil count, or lymphocyte count and those with missing  
13 covariates. As a result, a total of 8387 individuals were ultimately included in the pool  
14 of eligible people. The flowchart of participant inclusion and exclusion is depicted in  
15 Figure 1. NHANES was approved by the National Center for Health Statistics  
16 Institutional Review Board, and participants provided written informed consent.  
17  
18  
19  
20  
21  
22

### 23 **Diagnosis of psoriasis and measurement of the NLR**

24 The outcome was a diagnosis of psoriasis based on a self-reported history of being  
25 told by a physician that they had psoriasis. To evaluate the severity levels of skin  
26 involvement, respondents were then asked to complete a set of questionnaires  
27 containing questions on the extent of psoriasis plaques on the body gauged by the  
28 number of palm-sized patches. Participants were needed to characterize their psoriasis  
29 into a category, including (i) little or no psoriasis, (ii) only a few patches, (iii) scattered  
30 patches and (iv) extensive psoriasis. For the sake of avoiding an increase in sampling  
31 error, we merged (ii), (iii), and (iv), which had smaller frequencies.  
32  
33  
34

35 Our predictor variable of prime interest was the NLR, calculated by dividing the  
36 neutrophil count by the lymphocyte count, which can be derived from laboratory data.  
37 Blood specimen collection was undertaken at mobile examination centers (MECs). The  
38 Beckman Coulter methodology was applied to determine complete blood count  
39 parameters (28).  
40  
41

### 42 **Assessment of covariates**

43 On the basis of published literature, we considered sociodemographic (29), lifestyle  
44 (30), and comorbid factors (31, 32) that may affect both psoriasis and NLR as potential  
45 confounders, including age, sex, race, poverty income ratio (PIR), education, body  
46 mass index (BMI), smoking, alcohol consumption, and a history of hypertension,  
47 diabetes, and cardiovascular disease (CVD). We utilized the same terminology as  
48 NHANES to describe racial categories. The PIR was measured by dividing the  
49 household's or individual's income by a specific poverty guideline. We classified the  
50 PIR into 3 levels: low income ( $\leq 1.3$ ), medium income ( $>1.3$  to 3.5), and high income  
51 ( $>3.5$ ). Educational attainment was grouped as high school or less, some college or an  
52 AA degree, and college graduate or above. Smokers were separated into the following  
53 categories: never smokers (those who have either never smoked or have smoked less  
54 than 100 cigarettes during their lifetime), former smokers (smoked at least 100  
55 cigarettes but had quit currently), and current smokers. We defined alcohol drinkers as  
56  
57  
58  
59  
60



those who had consumed at least 12 drinks in any given year. Comorbid conditions were ascertained by respondent self-reports.

### Statistical analysis

We used the STROBE cross-sectional checklist when writing our report (33). We first compared the baseline characteristics among individuals with and without psoriasis, using Student's t test for normally distributed quantitative variables, the nonparametric Kruskal–Wallis test for skewed quantitative variables, and the chi-square test for qualitative variables. Descriptive statistics are presented as the mean (SD) or median (interquartile range) for continuous variables and the number (percentage) of participants for categorical variables. Binary and multinomial logistic regression models were then fitted to estimate the relation of the NLR with psoriasis and psoriasis lesion severity, respectively. Three different multivariate models were developed. Model 1 was a basic unadjusted model. In Model 2, adjustments were made for age, sex, ethnicity, PIR, and educational attainment. Model 3 included all variables in Model 2 plus BMI, smoking, alcohol consumption status and medical comorbidities (hypertension, diabetes, and CVD). Linear trend tests were performed by treating the median concentration of each NLR quartile as a continuous variable. We entered the NLR into logistic regression analysis as a continuous variable and as a quartile categorical variable to explore the strength of risk association with psoriasis. Stratified analyses were conducted using multivariate logistic regression according to age (18–39, 40–59, 60–79, and  $\geq 80$  years), sex, race, PIR and education at baseline, incorporating a two-way interaction term between the NLR and subgroup status. We then used restricted cubic spline (RCS) regressions with four knots to detect the possible nonlinear relationship of the NLR with psoriasis. All analyses were performed using R software (version 4.1.3).  $P < 0.05$  (two-sided) was considered indicative of statistical significance.

### Results

Of 11977 participants aged over 18 years from the 2011–2014 NHANES cycles, those with missing relevant data ( $n=3590$ ) were excluded from the analyses, leaving 238 adults with psoriasis and 8149 adults without psoriasis for inclusion. A total of 4254 were female (50.7%), and 4133 were male (49.3%), with an average age of 48.7 years.

Table 1 illustrates the demographic, lifestyle and clinical features of the included subjects stratified by the presence and absence of psoriasis. In comparison to the group without psoriasis, individuals with psoriasis were older (51.3 vs. 47.2,  $P < 0.001$ ) and more likely to be non-Hispanic whites (79.7% vs. 68.4%,  $P = 0.001$ ) but less likely to be current smokers (10.9% vs. 20.0%,  $P < 0.001$ ). The prevalence of hypertension (42.2% vs. 32.7%,  $P = 0.032$ ), diabetes (16.7% vs. 10.0%,  $P = 0.006$ ), and CVD (12.1% vs. 8.2%,  $P = 0.024$ ) at baseline was higher among participants with psoriasis than among those without psoriasis. In addition, higher NLR levels were observed in patients who had psoriasis (2.4 vs. 2.0,  $P < 0.001$ ). The psoriasis and nonpsoriasis groups did not differ

1  
2  
3 significantly with regard to sex, income, educational attainment, BMI, or alcohol  
4 consumption.  
5

6 The results of binary logistic regression are summarized in Table 2. In univariate  
7 models, NLR as a continuous variable was associated with a 19% increased risk of  
8 psoriasis (OR 1.19, 95% CI 1.11–1.28,  $P<0.001$ ), and the OR for quartile 4 was  
9 significantly higher than the OR for quartile 1 (Q4 vs. Q1: OR 2.62, 95% CI 1.58–4.32,  
10  $P_{\text{trend}}<0.001$ ). The association between the NLR and psoriasis persisted even after  
11 adjusting for sociodemographic variables (OR 1.16, 95% CI 1.08–1.24,  $P<0.001$ ). In  
12 the fully adjusted models, those with the highest quartile of the NLR had more than two  
13 times greater odds of having psoriasis than those with the lowest quartile (Q4 vs. Q1:  
14 OR 2.22, 95% CI 1.27–3.87,  $P=0.01$ ).  
15

16 Findings from the multinomial logistic regression are detailed in Table 3. A  
17 pronounced correlation was found between the NLR and the severity of psoriasis,  
18 except for a slight nonsignificant relationship between the NLR and those with little or  
19 no psoriasis after adjusting for all variables, regardless of whether the NLR was used  
20 as a continuous (OR 1.08, 95% CI 1.00–1.17,  $P=0.06$ ) or quartile variable (Q4 vs. Q1:  
21 OR 2.04, 95% CI 1.00–4.17,  $P=0.052$ ). In all models, the ORs of psoriasis severity  
22 increased as the quartile of the NLR increased. Compared to participants with an  
23  $\text{NLR}\leq 1.47$  (Q1), those with an  $\text{NLR}>2.63$  (Q4) had a significant increase in the odds  
24 of “few patches to extensive psoriasis” (Q4 vs. Q1: OR 2.43, 95% CI 1.10–5.36,  
25  $P=0.003$ ). High NLR values were associated with having more severe psoriasis.  
26

27 Stratified analyses were undertaken by dividing the participants into prespecified  
28 subgroups of sociodemographic position at baseline to assess the consistency of the  
29 relationship between the main predictors and outcome (Supplemental Table S1). An  
30 increased NLR was a risk factor for the presence of psoriasis in participants aged 40 to  
31 59 (OR 1.28, 95% CI 1.05–1.56,  $P=0.019$ ) and 60 to 79 (OR 1.24, 95% CI 1.09–1.41,  
32  $P=0.004$ ) years. For each unit increase in the NLR, the adjusted OR for psoriasis risk  
33 was 1.22 in females ( $P=0.016$ ), 1.13 in males ( $P=0.03$ ), 1.17 in non-Hispanic white  
34 individuals ( $P=0.006$ ), 2.50 in other races ( $P=0.023$ ), and 1.21 in participants with a  
35 medium PIR ( $P=0.021$ ). For the subgroup stratified by education level, the association  
36 of the NLR with psoriasis was nonsignificant only in the “Some College or AA degree”  
37 stratification (OR 0.96, 95% CI 0.77–1.20,  $P=0.693$ ). Moreover, there was no evidence  
38 of interaction effects between multiple stratification factors and the NLR (all  $P$  for  
39 interaction  $>0.1$ ).  
40

41 To flexibly model and visualize the relationship between the NLR and psoriasis,  
42 restricted cubic splines were used (Figure 2). We observed a strong nonlinear  
43 association between the NLR and psoriasis. In Model 1, the OR of psoriasis decreased  
44 continuously before the NLR reached 1.40, after which it started to increase and became  
45 relatively stable when the NLR reached 2.97 or higher ( $P$  for nonlinearity=0.002).  
46 Similar results were observed in the multivariable-adjusted models. The curve plots of  
47 Model 2 and Model 3 showed that the OR values decreased within a lower range of  
48 NLR, reached the lowest point at an NLR of 1.50, and then started to increase. The RCS  
49 curves of Model 2 and Model 3 reached a plateau after the NLR reached 3.08 and 3.13,  
50 respectively (Model 2:  $p$  for nonlinearity=0.004; Model 3:  $p$  for nonlinearity=0.003).  
51  
52  
53  
54  
55  
56  
57  
58  
59  
60

1  
2  
3 In the partially adjusted model (i.e., Model 2), the OR value for psoriasis was 1 when  
4 the NLR was 0.84 and 2.01, while in the fully adjusted model (i.e., Model 3), the OR  
5 value for psoriasis was 1 when the NLR was 0.89 and 2.01.  
6  
7

## 8 9 **Discussion**

10  
11 In this observational study, we analysed standardized data from a large cohort of  
12 participants in a US population sample. Our study identified that the NLR was increased  
13 in psoriasis patients and positively correlated with the disease severity. Taking into  
14 account that an imbalance in the baseline characteristics of participants may modify the  
15 association between the NLR and psoriasis, adjustments were made for potential  
16 confounders in regression analysis; nevertheless, we still detected a significant  
17 association of the NLR with psoriasis, indicating that this association cannot be solely  
18 attributed to risk factors and that the NLR could independently predict either the  
19 presence of psoriasis or the severity of psoriatic skin lesions. In the multivariable-  
20 adjusted RCS analysis, the NLR showed a strong nonlinear association with psoriasis  
21 risk, with the lowest risk at an NLR of 1.50. We also found that an NLR ranging  
22 between 0.89 and 2.01 was associated with a lower risk of psoriasis after accounting  
23 for all covariates, which meant that an NLR within an appropriate range might be a  
24 protective factor against psoriasis.  
25  
26  
27  
28

29  
30 Neutrophils and T lymphocytes play critical roles in the development and  
31 progression of psoriasis. Massive infiltration of neutrophils within the dermis and  
32 epidermis is one of the classic histological features of psoriasis (34). As the first line of  
33 defence against immune attack, neutrophils are actively recruited to the affected skin  
34 and are responsible for propagating inflammation (35). Respiratory burst, degranulation  
35 and neutrophil extracellular trap formation are the main anti-inflammatory mechanisms  
36 of neutrophils that contribute to the immunopathogenesis of psoriasis (36). T  
37 lymphocytes that produce high levels of IL-17 driven by IL-23 have been corroborated  
38 as pathogenic culprits in psoriasis (5). IL-17 mediates effects on keratinocytes, which  
39 facilitates the recruitment of more IL-17-producing lymphocytes and neutrophils into  
40 inflamed psoriatic lesions, establishing a self-amplifying feedback loop to maintain and  
41 exacerbate inflammatory events in psoriasis (5, 37). The NLR, originating from the  
42 ratio of neutrophils to lymphocytes in peripheral blood, may have the ability to mirror  
43 the balance between innate and adaptive immune responses (32). Aberrant NLR values  
44 are representative of inflammatory conditions in the body, but as of now, there is no  
45 universally acceptable NLR cut-off value that defines its range of normalcy (38). The  
46 circulating levels of neutrophils and lymphocytes vary from person to person and  
47 fluctuate over the course of an individual's disease. In addition, patients' medication  
48 usage has an impact on peripheral leukocyte levels. Thus, it remains a challenge to  
49 ensure that the NLR becomes a reasonable and individually standardized predictor of  
50 health outcomes.  
51  
52  
53  
54  
55

56  
57 Recently, a number of investigators have examined the diagnostic and prognostic  
58 value of the NLR in psoriasis. In an observational study comprising 60 psoriasis  
59 patients along with 50 healthy controls, increased NLR values were found in the patient  
60

1  
2  
3 group when compared to controls, which is in line with our results (39). Prior studies  
4 have shown that greater NLR values were associated with higher scores on the Psoriasis  
5 Area and Severity Index (PASI) (40, 41). Similar findings were mirrored in another  
6 study that reported a significant increase in the NLR in patients with PASI scores of 10  
7 or more compared to patients with PASI scores of less than 10 (20). Nevertheless,  
8 several studies failed to find a significant association between the NLR and the clinical  
9 severity of psoriasis (23, 42). Moreover, the NLR was proposed to be a robust predictor  
10 for the emergence of psoriatic arthritis in patients who had psoriasis (20, 43, 44). It has  
11 been reported that the NLR is capable of predicting all-cause mortality and  
12 cardiovascular risk (45), and this index might be a novel biomarker to assess the risk of  
13 subclinical atherosclerosis in patients with psoriasis (22, 46). The NLR is believed to  
14 have the potential to predict treatment response because a remarkable reduction in the  
15 NLR was observed in psoriasis patients who underwent effective treatment (47, 48). As  
16 mentioned above, the NLR was increased in psoriasis patients, but it declined after  
17 treatment, whereas initial works investigating the relationship of the NLR with psoriasis  
18 severity produced inconsistent results. These studies were limited by sample size and  
19 bias, and the association between the NLR and psoriasis may be influenced by  
20 sociodemographic characteristics (29), personal health habits (49, 50), and individual  
21 medical history (51, 52). Given that a too high or too low NLR might signal a  
22 pathological state, there is a strong likelihood of a nonlinear relationship between the  
23 NLR and psoriasis that has not yet been explored and identified in earlier studies.

24  
25 Our study has some strengths and clinical implications. Foremost, we used a  
26 nationally representative sample from NHANES, which offered sufficient statistical  
27 power to draw a conclusion and made our findings likely generalizable to the entire US  
28 population. The NHANES database contains comprehensive information on  
29 sociodemographic status, lifestyle exposures, physical measurements, and medical  
30 history, which enabled us to control for numerous confounding factors. Additionally,  
31 the NLR is a readily available index that may assist clinicians in identifying patients at  
32 high risk of severe psoriasis.

33  
34 However, there were several limitations to this study that should be noted. First, as  
35 this was a cross-sectional observational study, inferences regarding whether this  
36 association is causal cannot be drawn. The true causality and possible mechanisms  
37 underlying the relationship between the NLR and psoriasis should be further examined.  
38 Second, because the definition of psoriasis and comorbidities (e.g., hypertension,  
39 diabetes, and CVD) relied on self-reports from the respondents instead of diagnoses  
40 made by two or more experienced dermatologists, the observed outcomes may be  
41 subject to recall bias. Additionally, the extent of psoriatic skin involvement was  
42 assessed by questionnaires instead of structured diagnostic scales, such as the Psoriasis  
43 Area Severity Index, which might affect the validity of the findings. NHANES  
44 categorizes psoriasis as (i) little or no psoriasis, (ii) only a few patches, (iii) scattered  
45 patches and (iv) extensive psoriasis, which cannot represent the severity of psoriasis in  
46 clinical practice. Finally, although we controlled for multiple potential confounders,  
47 unknown and unmeasured confounders may have impacted our estimates. For instance,  
48 the use of immunomodulatory drugs may influence the correlation between the NLR  
49  
50  
51  
52  
53  
54  
55  
56  
57  
58  
59  
60

1  
2  
3 and psoriasis (53, 54). However, NHANES did not collect any information on the use  
4 of immunomodulatory medication. Future rigorously designed and sufficiently  
5 powered studies with greater use of immunomodulatory drugs may offer valuable  
6 insights into the complex interplay between psoriasis and the NLR.  
7  
8  
9

## 10 **Conclusion**

11  
12 In summary, our study elucidated that the NLR was independently associated with  
13 psoriasis and that the association was nonlinear rather than simply linear. We also found  
14 evidence in favour of a clear link between the NLR and psoriasis severity. However,  
15 further research is warranted to elaborate the detailed mechanism of the NLR in  
16 psoriasis.  
17  
18  
19

## 20 **Acknowledgements**

21  
22 We thank all the investigators of National Health and Nutrition Examination Survey  
23 who provided the original data.  
24  
25  
26

## 27 **Author Contributions**

28  
29 JH designed the research, conducted statistical analysis, and wrote the manuscripts. ML  
30 and NL directed the study and revised the manuscripts. All authors contributed to the  
31 article and approved the submitted version.  
32  
33  
34

## 35 **Funding**

36  
37 This work was supported by grants from National Natural Science Foundation of China  
38 (82173432), CAMS Innovation Fund for Medical Sciences (2017-I2M-1-017, 2021-  
39 I2M-1-001).  
40  
41  
42

43 **Competing interests** None declared.  
44  
45  
46

## 47 **Patient and public involvement**

48  
49 Patients or the public were not involved in the design, or conduct, or reporting, or  
50 dissemination plans of our research.  
51  
52  
53

## 54 **Ethics approval**

55  
56 NHANES was approved by the National Center for Health Statistics Institutional  
57 Review Board, and participants provided written informed consent.  
58  
59  
60

## **Data availability statement**

1  
2  
3  
4  
5  
6  
7  
8  
9  
10  
11  
12  
13  
14  
15  
16  
17  
18  
19  
20  
21  
22  
23  
24  
25  
26  
27  
28  
29  
30  
31  
32  
33  
34  
35  
36  
37  
38  
39  
40  
41  
42  
43  
44  
45  
46  
47  
48  
49  
50  
51  
52  
53  
54  
55  
56  
57  
58  
59  
60

Data are available in a public, open access repository. Open access data are available on the NHANES website ([www.cdc.gov/nchs/nhanes/](http://www.cdc.gov/nchs/nhanes/)).

For peer review only

## References

1. Boehncke WH, Schön MP. Psoriasis. *Lancet* 2015;386(9997):983-94.
2. Armstrong AW, Mehta MD, Schupp CW, et al. Psoriasis Prevalence in Adults in the United States. *JAMA Dermatol* 2021;157(8):940-6.
3. WHO. Global report on psoriasis. Geneva: World Health Organization, 2016. Available: <https://apps.who.int/iris/handle/10665/204417>.
4. Takeshita J, Grewal S, Langan SM, et al. Psoriasis and comorbid diseases: Epidemiology. *J Am Acad Dermatol* 2017;76(3):377-90.
5. Hawkes JE, Chan TC, Krueger JG. Psoriasis pathogenesis and the development of novel targeted immune therapies. *J Allergy Clin Immunol* 2017;140(3):645-53.
6. Ferro D, Matias M, Neto J, et al. Neutrophil-to-Lymphocyte Ratio Predicts Cerebral Edema and Clinical Worsening Early After Reperfusion Therapy in Stroke. *Stroke* 2021;52(3):859-67.
7. Zahorec R. Ratio of neutrophil to lymphocyte counts--rapid and simple parameter of systemic inflammation and stress in critically ill. *Bratisl Lek Listy* 2001;102(1):5-14.
8. Bhindi B, Hermanns T, Wei Y, et al. Identification of the best complete blood count-based predictors for bladder cancer outcomes in patients undergoing radical cystectomy. *Br J Cancer* 2016;114(2):207-12.
9. Liu S, Zheng H, Zhu X, et al. Neutrophil-to-lymphocyte ratio is associated with diabetic peripheral neuropathy in type 2 diabetes patients. *Diabetes Res Clin Pract* 2017;130:90-7.
10. Boulos D, Proudman SM, Metcalf RG, et al. The neutrophil-lymphocyte ratio in early rheumatoid arthritis and its ability to predict subsequent failure of triple therapy. *Semin Arthritis Rheum* 2019;49(3):373-6.
11. Liu Y, Du X, Chen J, et al. Neutrophil-to-lymphocyte ratio as an independent risk factor for mortality in hospitalized patients with COVID-19. *J Infect* 2020;81(1):e6-e12.
12. Paliogiannis P, Fois AG, Sotgia S, et al. Neutrophil to lymphocyte ratio and clinical outcomes in COPD: recent evidence and future perspectives. *Eur Respir Rev* 2018;27(147).
13. Cupp MA, Cariolou M, Tzoulaki I, et al. Neutrophil to lymphocyte ratio and cancer prognosis: an umbrella review of systematic reviews and meta-analyses of observational studies. *BMC Med* 2020;18(1):360.
14. Song M, Graubard BI, Rabkin CS, et al. Neutrophil-to-lymphocyte ratio and mortality in the United States general population. *Sci Rep* 2021;11(1):464.
15. Templeton AJ, McNamara MG, Šeruga B, et al. Prognostic role of neutrophil-to-lymphocyte ratio in solid tumors: a systematic review and meta-analysis. *J Natl Cancer Inst* 2014;106(6):dju124.
16. Bhikram T, Sandor P. Neutrophil-lymphocyte ratios as inflammatory biomarkers in psychiatric patients. *Brain Behav Immun* 2022;105:237-46.
17. Zulfic Z, Weickert CS, Weickert TW, et al. Neutrophil-lymphocyte ratio - a simple, accessible measure of inflammation, morbidity and prognosis in psychiatric disorders? *Australas Psychiatry* 2020;28(4):454-8.
18. Mazza MG, Lucchi S, Tringali AGM, et al. Neutrophil/lymphocyte ratio and platelet/lymphocyte ratio in mood disorders: A meta-analysis. *Prog Neuropsychopharmacol Biol Psychiatry* 2018;84(Pt A):229-36.
19. Minakawa S, Kaneko T, Matsuzaki Y, et al. Psoriasis Area and Severity Index is closely related to serum C-reactive protein level and neutrophil to lymphocyte ratio in Japanese patients. *J Dermatol*

- 2017;44(10):e236-e7.
20. Kim DS, Shin D, Lee MS, et al. Assessments of neutrophil to lymphocyte ratio and platelet to lymphocyte ratio in Korean patients with psoriasis vulgaris and psoriatic arthritis. *J Dermatol* 2016;43(3):305-10.
21. Solak B, Dikicier BS, Erdem T. Impact of Elevated Serum Uric Acid Levels on Systemic Inflammation in Patients With Psoriasis. *Angiology* 2017;68(3):266-70.
22. Kvist-Hansen A, Kaiser H, Krakauer M, et al. Neutrophil-to-lymphocyte ratio and the systemic immune-inflammation index as potential biomarkers of effective treatment and subclinical atherosclerotic cardiovascular disease in patients with psoriasis. *J Eur Acad Dermatol Venereol* 2023;37(5):e586-e9.
23. Paliogiannis P, Satta R, Deligia G, et al. Associations between the neutrophil-to-lymphocyte and the platelet-to-lymphocyte ratios and the presence and severity of psoriasis: a systematic review and meta-analysis. *Clin Exp Med* 2019;19(1):37-45.
24. Dey AK, Teague HL, Adamstein NH, et al. Association of neutrophil-to-lymphocyte ratio with non-calcified coronary artery burden in psoriasis: Findings from an observational cohort study. *J Cardiovasc Comput Tomogr* 2021;15(4):372-9.
- [dataset] 25. Centers for Disease Control and Prevention (CDC). National health and nutrition examination survey (NHANES). About NHANES. Available: [https://www.cdc.gov/nchs/nhanes/about\\_nhanes.htm](https://www.cdc.gov/nchs/nhanes/about_nhanes.htm) (accessed 28 April 2023).
- [dataset] 26. Centers for Disease Control and Prevention (CDC). National health and nutrition examination survey (NHANES). Sample Design. Available: <https://www.cdc.gov/nchs/nhanes/tutorials/SampleDesign.aspx> (accessed 28 April 2023).
- [dataset] 27. Centers for Disease Control and Prevention (CDC). National health and nutrition examination survey (NHANES). NHANES Questionnaires, Datasets, and Related Documentation. Available: <https://www.cdc.gov/nchs/nhanes/Default.aspx> (accessed 10 April 2023).
- [dataset] 28. National Health and Nutrition Examination Survey (NHANES). Laboratory procedure manual. Available: [https://www.cdc.gov/nchs/data/nhanes/2011-2012/labmethods/cbc\\_g\\_met\\_he.pdf](https://www.cdc.gov/nchs/data/nhanes/2011-2012/labmethods/cbc_g_met_he.pdf) (accessed 18 April 2023).
29. Howard R, Scheiner A, Kanetsky PA, et al. Sociodemographic and lifestyle factors associated with the neutrophil-to-lymphocyte ratio. *Ann Epidemiol* 2019;38:11-21.e6.
30. Dai YX, Wang SC, Chou YJ, et al. Smoking, but not alcohol, is associated with risk of psoriasis in a Taiwanese population-based cohort study. *J Am Acad Dermatol* 2019;80(3):727-34.
31. Bu J, Ding R, Zhou L, et al. Epidemiology of Psoriasis and Comorbid Diseases: A Narrative Review. *Front Immunol* 2022;13:880201.
32. Kim S, Eliot M, Koestler DC, et al. Association of Neutrophil-to-Lymphocyte Ratio With Mortality and Cardiovascular Disease in the Jackson Heart Study and Modification by the Duffy Antigen Variant. *JAMA Cardiol* 2018;3(6):455-62.
33. von Elm E, Altman DG, Egger M, et al. The Strengthening the Reporting of Observational Studies in Epidemiology (STROBE) statement: guidelines for reporting observational studies. *PLoS Med* 2007;4(10):e296.
34. Schön MP, Broekaert SM, Erpenbeck L. Sexy again: the renaissance of neutrophils in psoriasis. *Exp Dermatol* 2017;26(4):305-11.
35. Lowes MA, Suárez-Fariñas M, Krueger JG. Immunology of psoriasis. *Annu Rev Immunol*



- 2014;32:227-55.
36. Chiang CC, Cheng WJ, Korinek M, et al. Neutrophils in Psoriasis. *Front Immunol* 2019;10:2376.
37. Chiricozzi A, Romanelli P, Volpe E, et al. Scanning the Immunopathogenesis of Psoriasis. *Int J Mol Sci* 2018;19(1).
38. Buonacera A, Stancanelli B, Colaci M, et al. Neutrophil to Lymphocyte Ratio: An Emerging Marker of the Relationships between the Immune System and Diseases. *Int J Mol Sci* 2022;23(7).
39. Sirin MC, Korkmaz S, Erturan I, et al. Evaluation of monocyte to HDL cholesterol ratio and other inflammatory markers in patients with psoriasis. *An Bras Dermatol* 2020;95(5):575-82.
40. Polat M, Bugdayci G, Kaya H, et al. Evaluation of neutrophil-to-lymphocyte ratio and platelet-to-lymphocyte ratio in Turkish patients with chronic plaque psoriasis. *Acta Dermatovenerol Alp Pannonica Adriat* 2017;26(4):97-100.
41. Sen BB, Rifaioglu EN, Ekiz O, et al. Neutrophil to lymphocyte ratio as a measure of systemic inflammation in psoriasis. *Cutan Ocul Toxicol* 2014;33(3):223-7.
42. Ataseven A, Bilgin AU, Kurtipek GS. The importance of neutrophil lymphocyte ratio in patients with psoriasis. *Mater Sociomed* 2014;26(4):231-3.
43. Nguyen HT, Vo LDH, Pham NN. Neutrophil-to-lymphocyte and platelet-to-lymphocyte ratios as inflammatory markers in psoriasis: a case-control study. *Dermatol Reports* 2023;15(1):9516.
44. Duran TI, Pamukcu M. Relationship between disease impact scores and C-reactive protein/albumin ratio in patients with psoriatic arthritis. *Croat Med J* 2022;63(2):141-7.
45. Adamstein NH, MacFadyen JG, Rose LM, et al. The neutrophil-lymphocyte ratio and incident atherosclerotic events: analyses from five contemporary randomized trials. *Eur Heart J* 2021;42(9):896-903.
46. Kaiser H, Wang X, Kvist-Hansen A, et al. Biomarkers of subclinical atherosclerosis in patients with psoriasis. *Sci Rep* 2021;11(1):21438.
47. Zhang L, Wiles C, Martinez LR, et al. Neutrophil-to-lymphocyte ratio decreases after treatment of psoriasis with therapeutic antibodies. *J Eur Acad Dermatol Venereol* 2017;31(11):e491-e2.
48. Andersen CSB, Kvist-Hansen A, Siewertsen M, et al. Blood Cell Biomarkers of Inflammation and Cytokine Levels as Predictors of Response to Biologics in Patients with Psoriasis. *Int J Mol Sci* 2023;24(7).
49. Budu-Aggrey A, Brumpton B, Tyrrell J, et al. Evidence of a causal relationship between body mass index and psoriasis: A mendelian randomization study. *PLoS Med* 2019;16(1):e1002739.
50. Wei J, Zhu J, Xu H, et al. Alcohol consumption and smoking in relation to psoriasis: a Mendelian randomization study. *Br J Dermatol* 2022;187(5):684-91.
51. Miller IM, Ellervik C, Yazdanyar S, et al. Meta-analysis of psoriasis, cardiovascular disease, and associated risk factors. *J Am Acad Dermatol* 2013;69(6):1014-24.
52. Zahorec R. Neutrophil-to-lymphocyte ratio, past, present and future perspectives. *Bratisl Lek Listy* 2021;122(7):474-88.
53. Blayney DW, Mohanlal R, Adamchuk H, et al. Efficacy of Plinabulin vs Pegfilgrastim for Prevention of Docetaxel-Induced Neutropenia in Patients With Solid Tumors: A Randomized Clinical Trial. *JAMA Netw Open* 2022;5(1):e2145446.
54. Loos AM, Liu S, Segel C, et al. Comparative effectiveness of targeted immunomodulators for the treatment of moderate-to-severe plaque psoriasis: A systematic review and network meta-analysis. *J Am Acad Dermatol* 2018;79(1):135-44.e7.

## Figure legends

**Figure 1.** Flow diagram of participants screened from the National Health and Nutrition Examination Survey (NHANES) 2011 to 2014.

Covariates included age, sex, race, income, education, body mass index, smoking, alcohol consumption, history of hypertension, diabetes and cardiovascular disease.

**Figure 2.** Nonlinear association between the NLR and psoriasis by restricted cubic spline regression.

The fitted regression line is shown as a red solid line; black dashed lines indicate where the OR equals 1; 95% CI is represented by a shaded region.

For peer review only

**Table 1** Baseline characteristics of participants with and without psoriasis.

| Characteristic            | Without psoriasis<br>(n=8149) | With psoriasis<br>(n=238) | P value |
|---------------------------|-------------------------------|---------------------------|---------|
| Age, mean (SD), y         | 47.2 (17.0)                   | 51.3 (15.4)               | <0.001  |
| Sex                       |                               |                           | 0.408   |
| Female                    | 4128 (51.0)                   | 126 (53.8)                |         |
| Male                      | 4021 (49.0)                   | 112 (46.2)                |         |
| Race                      |                               |                           | 0.001   |
| Mexican American          | 904 (7.9)                     | 15 (4.1)                  |         |
| Other Hispanic            | 759 (5.8)                     | 24 (5.1)                  |         |
| Non-Hispanic White        | 3467 (68.4)                   | 136 (79.7)                |         |
| Non-Hispanic Black        | 1842 (10.7)                   | 28 (4.8)                  |         |
| Non-Hispanic Asian        | 931 (4.6)                     | 26 (4.0)                  |         |
| Other Race                | 246 (2.6)                     | 9 (2.3)                   |         |
| Poverty income ratio      |                               |                           | 0.81    |
| Low                       | 2793 (23.9)                   | 84 (22.7)                 |         |
| Medium                    | 2800 (34.5)                   | 76 (33.8)                 |         |
| High                      | 2556 (41.6)                   | 78 (43.5)                 |         |
| Education                 |                               |                           | 0.405   |
| High school or less       | 3444 (35.4)                   | 91 (30.4)                 |         |
| Some college or AA degree | 2559 (32.8)                   | 79 (33.4)                 |         |
| College graduate or above | 2146 (31.8)                   | 68 (36.2)                 |         |
| BMI                       |                               |                           | 0.071   |
| Underweight (<18.5)       | 133 (1.4)                     | 0 (0.0)                   |         |
| Normal (18.5 to <25)      | 2382 (28.8)                   | 52 (20.8)                 |         |
| Overweight (25 to <30)    | 2618 (33.2)                   | 89 (41.6)                 |         |
| Obese (30 or greater)     | 3016 (36.6)                   | 97 (37.6)                 |         |
| Smoking status            |                               |                           | <0.001  |
| Never smoker              | 4594 (56.2)                   | 121 (49.4)                |         |
| Former smoker             | 1888 (23.9)                   | 82 (39.7)                 |         |
| Current smoker            | 1667 (20.0)                   | 35 (10.9)                 |         |
| Alcohol drinker           |                               |                           | 0.899   |
| No                        | 2157 (20.6)                   | 65 (20.3)                 |         |
| Yes                       | 5992 (79.4)                   | 173 (79.7)                |         |
| Hypertension              |                               |                           | 0.032   |
| No                        | 5207 (67.3)                   | 129 (57.8)                |         |
| Yes                       | 2942 (32.7)                   | 109 (42.2)                |         |
| Diabetes                  |                               |                           | 0.006   |
| No                        | 7090 (90.0)                   | 190 (83.3)                |         |
| Yes                       | 1059 (10.0)                   | 48 (16.7)                 |         |
| History of CVD            |                               |                           | 0.024   |
| No                        | 7352 (91.8)                   | 197 (87.9)                |         |
| Yes                       | 797 (8.2)                     | 41 (12.1)                 |         |
| NLR                       | 2.0 (1.5, 2.6)                | 2.4 (1.8, 3.2)            | <0.001  |

1  
2  
3 Median (SD) or median (interquartile range) for continuous; n (%) for categorical.  
4 Abbreviations: BMI, body mass index; CVD, cardiovascular disease; NLR, neutrophil-  
5 to-lymphocyte ratio.  
6  
7  
8  
9  
10  
11  
12  
13  
14  
15  
16  
17  
18  
19  
20  
21  
22  
23  
24  
25  
26  
27  
28  
29  
30  
31  
32  
33  
34  
35  
36  
37  
38  
39  
40  
41  
42  
43  
44  
45  
46  
47  
48  
49  
50  
51  
52  
53  
54  
55  
56  
57  
58  
59  
60

For peer review only

**Table 2** Association between the neutrophil-to-lymphocyte ratio (NLR) and the presence of psoriasis.

| Variable           | Model 1           |         | Model 2           |         | Model 3           |         |
|--------------------|-------------------|---------|-------------------|---------|-------------------|---------|
|                    | OR (95% CI)       | P value | OR (95% CI)       | P value | OR (95% CI)       | P value |
| NLR (continuous)   | 1.19 (1.11, 1.28) | <0.001  | 1.16 (1.08, 1.24) | <0.001  | 1.15 (1.05, 1.25) | 0.006   |
| NLR (quartile)     |                   |         |                   |         |                   |         |
| Q1 ( $\leq 1.47$ ) | Reference         |         | Reference         |         | Reference         |         |
| Q2 (1.47–1.96)     | 1.14 (0.67, 1.94) | 0.613   | 1.05 (0.61, 1.82) | 0.849   | 1.05 (0.59, 1.89) | 0.848   |
| Q3 (1.96–2.63)     | 1.48 (0.93, 2.36) | 0.095   | 1.34 (0.83, 2.18) | 0.218   | 1.31 (0.77, 2.24) | 0.282   |
| Q4 ( $> 2.63$ )    | 2.62 (1.58, 4.32) | <0.001  | 2.25 (1.35, 3.76) | 0.004   | 2.22 (1.27, 3.87) | 0.01    |
| P for trend        | <0.001            |         | 0.001             |         | 0.004             |         |

Model 1: no covariates were adjusted. Model 2: adjusted for age, sex, race, income, and education. Model 3: adjusted for age, sex, race, income, education, body mass index, smoking status, alcohol consumption, history of hypertension, diabetes and cardiovascular disease.

**Table 3** Association between the neutrophil-to-lymphocyte ratio (NLR) and the severity of psoriasis.

| Model   | Psoriasis severity                 | Continuous OR (95% CI) | P value | OR (95%CI) |                   |                   |                   | P value |
|---------|------------------------------------|------------------------|---------|------------|-------------------|-------------------|-------------------|---------|
|         |                                    |                        |         | Q1         | Q2                | Q3                | Q4                |         |
| Model 1 | Little or no psoriasis             | 1.13 (1.06, 1.21)      | <0.001  | Reference  | 1.30 (0.59, 2.85) | 1.81 (0.97, 3.35) | 2.41 (1.30, 4.48) | 0.01    |
| Model 2 | Few patches to extensive psoriasis | 1.22 (1.11, 1.34)      | <0.001  | Reference  | 0.95 (0.37, 2.44) | 1.09 (0.47, 2.55) | 2.86 (1.34, 6.07) | <0.001  |
| Model 3 | Little or no psoriasis             | 1.10 (1.03, 1.18)      | 0.008   | Reference  | 1.18 (0.52, 2.72) | 1.62 (0.85, 3.09) | 2.07 (1.08, 3.96) | 0.034   |
| Model 4 | Few patches to extensive psoriasis | 1.20 (1.10, 1.31)      | <0.001  | Reference  | 0.89 (0.35, 2.29) | 1.00 (0.41, 2.44) | 2.49 (1.17, 5.29) | 0.003   |
| Model 5 | Little or no psoriasis             | 1.08 (1.00, 1.17)      | 0.06    | Reference  | 1.21 (0.49, 2.96) | 1.61 (0.80, 3.22) | 2.04 (1.00, 4.17) | 0.052   |
| Model 6 | Few patches to extensive psoriasis | 1.19 (1.07, 1.33)      | 0.004   | Reference  | 0.88 (0.33, 2.34) | 0.95 (0.36, 2.54) | 2.43 (1.10, 5.36) | 0.003   |

In multinomial logistic regression models, the association between the NLR and psoriasis severity was tested with patients never diagnosed with psoriasis as the reference group. Q1, NLR $\leq$ 1.47; Q2, NLR 1.47–1.96; Q3, NLR 1.96–2.63; Q4, NLR $>$ 2.63.

1  
2  
3  
4  
5  
6  
7  
8  
9  
10  
11  
12  
13  
14  
15  
16  
17  
18  
19  
20  
21  
22  
23  
24  
25  
26  
27  
28  
29  
30  
31  
32  
33  
34  
35  
36  
37  
38  
39  
40  
41  
42  
43  
44  
45  
46  
47  
48  
49  
50  
51  
52  
53  
54  
55  
56  
57  
58  
59  
60



Figure 1. Flow diagram of participants screened from National Health and Nutrition Examination Survey (NHANES) 2011 to 2014. Covariates included age, sex, race, income, education, body mass index, smoking, alcohol use, history of hypertension, diabetes and cardiovascular disease.

129x91mm (300 x 300 DPI)



Figure 2. Nonlinear association between NLR and psoriasis by restricted cubic spline regression. Fitted regression line was shown as red solid line; black dashed lines indicated where the OR equals 1; 95%CI is represented by shaded region.

210x297mm (300 x 300 DPI)



**Table S1** Subgroup analysis for the association between the neutrophil-to-lymphocyte ratio (NLR) as a continuous variable and the presence of psoriasis.

| Subgroup                  | OR (95%CI)        | P value | P for interaction |
|---------------------------|-------------------|---------|-------------------|
| Age, y                    |                   |         | 0.118             |
| 18-39                     | 1.01 (0.74, 1.37) | 0.972   |                   |
| 40-59                     | 1.28 (1.05, 1.56) | 0.019   |                   |
| 60-79                     | 1.24 (1.09, 1.41) | 0.004   |                   |
| ≥80                       | 0.99 (0.82, 1.19) | 0.921   |                   |
| Sex                       |                   |         | 0.301             |
| Female                    | 1.22 (1.05, 1.43) | 0.016   |                   |
| Male                      | 1.13 (1.01, 1.25) | 0.03    |                   |
| Race                      |                   |         | 0.984             |
| Mexican American          | 1.04 (0.86, 1.25) | 0.613   |                   |
| Other Hispanic            | 1.17 (0.83, 1.64) | 0.331   |                   |
| Non-Hispanic White        | 1.17 (1.05, 1.30) | 0.006   |                   |
| Non-Hispanic Black        | 1.16 (0.96, 1.39) | 0.114   |                   |
| Non-Hispanic Asian        | 1.14 (0.74, 1.76) | 0.522   |                   |
| Other Race                | 2.50 (1.17, 5.34) | 0.023   |                   |
| Poverty income ratio      |                   |         | 0.63              |
| Low                       | 1.09 (0.88, 1.35) | 0.397   |                   |
| Medium                    | 1.21 (1.03, 1.41) | 0.021   |                   |
| High                      | 1.14 (0.93, 1.39) | 0.185   |                   |
| Education                 |                   |         | 0.181             |
| High school or less       | 1.18 (1.07, 1.31) | 0.004   |                   |
| Some college or AA degree | 0.96 (0.77, 1.20) | 0.693   |                   |
| College graduate or above | 1.26 (1.05, 1.52) | 0.019   |                   |

Each stratification was adjusted for all covariates except the stratification factor itself.

**STROBE 2007 (v4) Statement—Checklist of items that should be included in reports of *cross-sectional studies***

| Section/Topic                | Item # | Recommendation                                                                                                                                                                       | Reported on page # |
|------------------------------|--------|--------------------------------------------------------------------------------------------------------------------------------------------------------------------------------------|--------------------|
| <b>Title and abstract</b>    | 1      | (a) Indicate the study's design with a commonly used term in the title or the abstract                                                                                               | 1                  |
|                              |        | (b) Provide in the abstract an informative and balanced summary of what was done and what was found                                                                                  | 2                  |
| <b>Introduction</b>          |        |                                                                                                                                                                                      |                    |
| Background/rationale         | 2      | Explain the scientific background and rationale for the investigation being reported                                                                                                 | 3                  |
| Objectives                   | 3      | State specific objectives, including any prespecified hypotheses                                                                                                                     | 3                  |
| <b>Methods</b>               |        |                                                                                                                                                                                      |                    |
| Study design                 | 4      | Present key elements of study design early in the paper                                                                                                                              | 4                  |
| Setting                      | 5      | Describe the setting, locations, and relevant dates, including periods of recruitment, exposure, follow-up, and data collection                                                      | 4                  |
| Participants                 | 6      | (a) Give the eligibility criteria, and the sources and methods of selection of participants                                                                                          | 4                  |
| Variables                    | 7      | Clearly define all outcomes, exposures, predictors, potential confounders, and effect modifiers. Give diagnostic criteria, if applicable                                             | 4                  |
| Data sources/<br>measurement | 8*     | For each variable of interest, give sources of data and details of methods of assessment (measurement). Describe comparability of assessment methods if there is more than one group | 4-5                |
| Bias                         | 9      | Describe any efforts to address potential sources of bias                                                                                                                            | 4                  |
| Study size                   | 10     | Explain how the study size was arrived at                                                                                                                                            | 4                  |
| Quantitative variables       | 11     | Explain how quantitative variables were handled in the analyses. If applicable, describe which groupings were chosen and why                                                         | 5                  |
| Statistical methods          | 12     | (a) Describe all statistical methods, including those used to control for confounding                                                                                                | 5                  |
|                              |        | (b) Describe any methods used to examine subgroups and interactions                                                                                                                  | 5                  |
|                              |        | (c) Explain how missing data were addressed                                                                                                                                          | N/A                |
|                              |        | (d) If applicable, describe analytical methods taking account of sampling strategy                                                                                                   | 4,5                |
|                              |        | (e) Describe any sensitivity analyses                                                                                                                                                | 5                  |
| <b>Results</b>               |        |                                                                                                                                                                                      |                    |

|                          |     |                                                                                                                                                                                                              |     |
|--------------------------|-----|--------------------------------------------------------------------------------------------------------------------------------------------------------------------------------------------------------------|-----|
| Participants             | 13* | (a) Report numbers of individuals at each stage of study—eg numbers potentially eligible, examined for eligibility, confirmed eligible, included in the study, completing follow-up, and analysed            | 5   |
|                          |     | (b) Give reasons for non-participation at each stage                                                                                                                                                         | N/A |
|                          |     | (c) Consider use of a flow diagram                                                                                                                                                                           | 4   |
| Descriptive data         | 14* | (a) Give characteristics of study participants (eg demographic, clinical, social) and information on exposures and potential confounders                                                                     | 5-6 |
|                          |     | (b) Indicate number of participants with missing data for each variable of interest                                                                                                                          | 5   |
| Outcome data             | 15* | Report numbers of outcome events or summary measures                                                                                                                                                         | 5   |
| Main results             | 16  | (a) Give unadjusted estimates and, if applicable, confounder-adjusted estimates and their precision (eg, 95% confidence interval). Make clear which confounders were adjusted for and why they were included | 6   |
|                          |     | (b) Report category boundaries when continuous variables were categorized                                                                                                                                    | 6   |
|                          |     | (c) If relevant, consider translating estimates of relative risk into absolute risk for a meaningful time period                                                                                             | N/A |
| Other analyses           | 17  | Report other analyses done—eg analyses of subgroups and interactions, and sensitivity analyses                                                                                                               | 6   |
| <b>Discussion</b>        |     |                                                                                                                                                                                                              |     |
| Key results              | 18  | Summarise key results with reference to study objectives                                                                                                                                                     | 7   |
| Limitations              | 19  | Discuss limitations of the study, taking into account sources of potential bias or imprecision. Discuss both direction and magnitude of any potential bias                                                   | 8-9 |
| Interpretation           | 20  | Give a cautious overall interpretation of results considering objectives, limitations, multiplicity of analyses, results from similar studies, and other relevant evidence                                   | 7-8 |
| Generalisability         | 21  | Discuss the generalisability (external validity) of the study results                                                                                                                                        | 8   |
| <b>Other information</b> |     |                                                                                                                                                                                                              |     |
| Funding                  | 22  | Give the source of funding and the role of the funders for the present study and, if applicable, for the original study on which the present article is based                                                | 9   |

\*Give information separately for cases and controls in case-control studies and, if applicable, for exposed and unexposed groups in cohort and cross-sectional studies.

**Note:** An Explanation and Elaboration article discusses each checklist item and gives methodological background and published examples of transparent reporting. The STROBE checklist is best used in conjunction with this article (freely available on the Web sites of PLoS Medicine at <http://www.plosmedicine.org/>, Annals of Internal Medicine at <http://www.annals.org/>, and Epidemiology at <http://www.epidem.com/>). Information on the STROBE Initiative is available at [www.strobe-statement.org](http://www.strobe-statement.org).
