# Supplementary material for: Association between the neutrophil-to-lymphocyte ratio and psoriasis: a cross-sectional study of the National Health and Nutrition Examination Survey 2011–2014
Source: PubMed Central journal article supplement — BMJ Open. 2023 Dec 7;13(12):e077596. doi: 10.1136/bmjopen-2023-077596 (PMC10711904; doi:10.1136/bmjopen-2023-077596), 2023-12-07
Supplement: bmjopen-2023-077596supp001.pdf [file bmjopen-2023-077596supp001.pdf]

**Table S1** Subgroup analysis for the association between the neutrophil-to-lymphocyte ratio (NLR) as a continuous variable and the presence of psoriasis.

| Subgroup                  | OR (95%CI)        | P value | P for interaction |
|---------------------------|-------------------|---------|-------------------|
| Age, y                    |                   |         | 0.118             |
| 18-39                     | 1.01 (0.74, 1.37) | 0.972   |                   |
| 40-59                     | 1.28 (1.05, 1.56) | 0.019   |                   |
| 60-79                     | 1.24 (1.09, 1.41) | 0.004   |                   |
| ≥80                       | 0.99 (0.82, 1.19) | 0.921   |                   |
| Sex                       |                   |         | 0.301             |
| Female                    | 1.22 (1.05, 1.43) | 0.016   |                   |
| Male                      | 1.13 (1.01, 1.25) | 0.03    |                   |
| Race                      |                   |         | 0.984             |
| Mexican American          | 1.04 (0.86, 1.25) | 0.613   |                   |
| Other Hispanic            | 1.17 (0.83, 1.64) | 0.331   |                   |
| Non-Hispanic White        | 1.17 (1.05, 1.30) | 0.006   |                   |
| Non-Hispanic Black        | 1.16 (0.96, 1.39) | 0.114   |                   |
| Non-Hispanic Asian        | 1.14 (0.74, 1.76) | 0.522   |                   |
| Other Race                | 2.50 (1.17, 5.34) | 0.023   |                   |
| Poverty income ratio      |                   |         | 0.63              |
| Low                       | 1.09 (0.88, 1.35) | 0.397   |                   |
| Medium                    | 1.21 (1.03, 1.41) | 0.021   |                   |
| High                      | 1.14 (0.93, 1.39) | 0.185   |                   |
| Education                 |                   |         | 0.181             |
| High school or less       | 1.18 (1.07, 1.31) | 0.004   |                   |
| Some college or AA degree | 0.96 (0.77, 1.20) | 0.693   |                   |
| College graduate or above | 1.26 (1.05, 1.52) | 0.019   |                   |

Each stratification was adjusted for all covariates except the stratification factor itself.
